# Supplementary material for: Soil microbiomes show consistent and predictable responses to extreme events
Source: PubMed Central journal article supplement (PMC11655354; doi:10.1038/s41586-024-08185-3), 2024-11-27
Supplement: 41586_2024_8185_MOESM1_ESM.pdf [file 41586_2024_8185_MOESM1_ESM.pdf]

## Supplementary information

---

# Soil microbiomes show consistent and predictable responses to extreme events

---

In the format provided by the authors and unedited

## Supplementary Table and Figures

**Supplementary Table 1. Site description for all sampling locations.** A full set of metadata is available (see Data availability statement in main text).

| <i>Replicate site</i> | <i>Soil class WRB</i> | <i>pH</i> | <i>Total soil carbon (%)</i> | <i>MAT</i> | <i>MAP</i> | <i>Latitude</i> | <i>Longitude</i> |
|-----------------------|-----------------------|-----------|------------------------------|------------|------------|-----------------|------------------|
| GR1                   | Haplic Luvisols       | 7.57      | 3.2                          | 13.4       | 482        | 40.62           | 23.07            |
| GR2                   | Haplic Luvisols       | 7.71      | 1.8                          | 13.4       | 482        | 40.62           | 23.06            |
| GR3                   | Haplic Cambisols      | 7.04      | 2.5                          | 13.4       | 482        | 40.62           | 23.08            |
| ES1                   | Haplic Cambisols      | 7.43      | 3.4                          | 14.5       | 416        | 40.15           | -3.50            |
| ES2                   | Petric Calcisols      | 7.89      | 9.0                          | 14.5       | 416        | 40.13           | -3.51            |
| ES3                   | Haplic Cambisols      | 7.44      | 4.4                          | 14.5       | 416        | 40.13           | -3.53            |
| EE1                   | Rendzic Leptosols     | 7.49      | 6.1                          | 5.7        | 604        | 58.71           | 23.79            |
| EE2                   | Haplic Cambisols      | 7.51      | 6.9                          | 5.7        | 591        | 58.74           | 23.70            |
| EE3                   | Haplic Gleysols       | 7.33      | 5.8                          | 5.7        | 579        | 58.73           | 23.60            |
| DE1                   | Haplic Cambisols      | 7.32      | 3.1                          | 8.8        | 502        | 51.39           | 11.87            |
| DE2                   | Haplic Cambisols      | 7.02      | 2.6                          | 8.9        | 493        | 51.39           | 11.88            |
| DE3                   | Haplic Cambisols      | 6.88      | 2.4                          | 8.9        | 493        | 51.39           | 11.88            |
| UKOx1                 | Haplic Cambisols      | 7.22      | 8.7                          | 9.7        | 627        | 51.77           | -1.33            |
| UKOx2                 | Haplic Cambisols      | 6.85      | 8.1                          | 9.7        | 627        | 51.77           | -1.33            |
| UKOx3                 | Haplic Cambisols      | 7.08      | 12.9                         | 9.8        | 618        | 51.77           | -1.33            |
| AT1                   | Haplic Podzols        | 4.73      | 3.5                          | -1.3       | 1383       | 47.13           | 12.62            |
| AT2                   | Haplic Podzols        | 5.52      | 6.9                          | -0.4       | 1324       | 47.13           | 12.63            |
| AT3                   | Haplic Podzols        | 4.81      | 4.7                          | -1.3       | 1383       | 47.13           | 12.62            |
| IS1                   | Haplic Cambisols      | 6.73      | 1.8                          | 3.4        | 604        | 65.77           | -18.23           |
| IS2                   | Haplic Podzols        | 6.23      | 4.7                          | 3.4        | 604        | 65.77           | -18.25           |
| IS3                   | Haplic Podzols        | 6.19      | 10.8                         | 3.1        | 623        | 65.77           | -18.25           |
| UKLa1                 | Haplic Podzols        | 5.87      | 3.5                          | 8.6        | 1147       | 54.01           | -2.79            |
| UKLa2                 | Haplic Cambisols      | 5.72      | 3.7                          | 8.6        | 1147       | 54.01           | -2.77            |
| UKLa3                 | Haplic Cambisols      | 5.78      | 3.6                          | 8.6        | 1147       | 54.01           | -2.77            |
| SE1                   | Haplic Cambisols      | 6.45      | 11.7                         | -2.0       | 476        | 68.29           | 19.17            |
| SE2                   | Haplic Cambisols      | 5.29      | 7.5                          | -0.5       | 435        | 68.30           | 19.17            |
| SE3                   | Haplic Cambisols      | 5.70      | 4.8                          | -0.5       | 435        | 68.30           | 19.17            |
| RU1                   | Haplic Kastanozems    | 6.73      | 1.4                          | 10.7       | 223        | 47.91           | 45.38            |
| RU2                   | Haplic Kastanozems    | 6.78      | 1.9                          | 10.7       | 223        | 47.91           | 45.38            |
| RU3                   | Haplic Kastanozems    | 6.92      | 1.6                          | 10.7       | 223        | 47.91           | 45.38            |

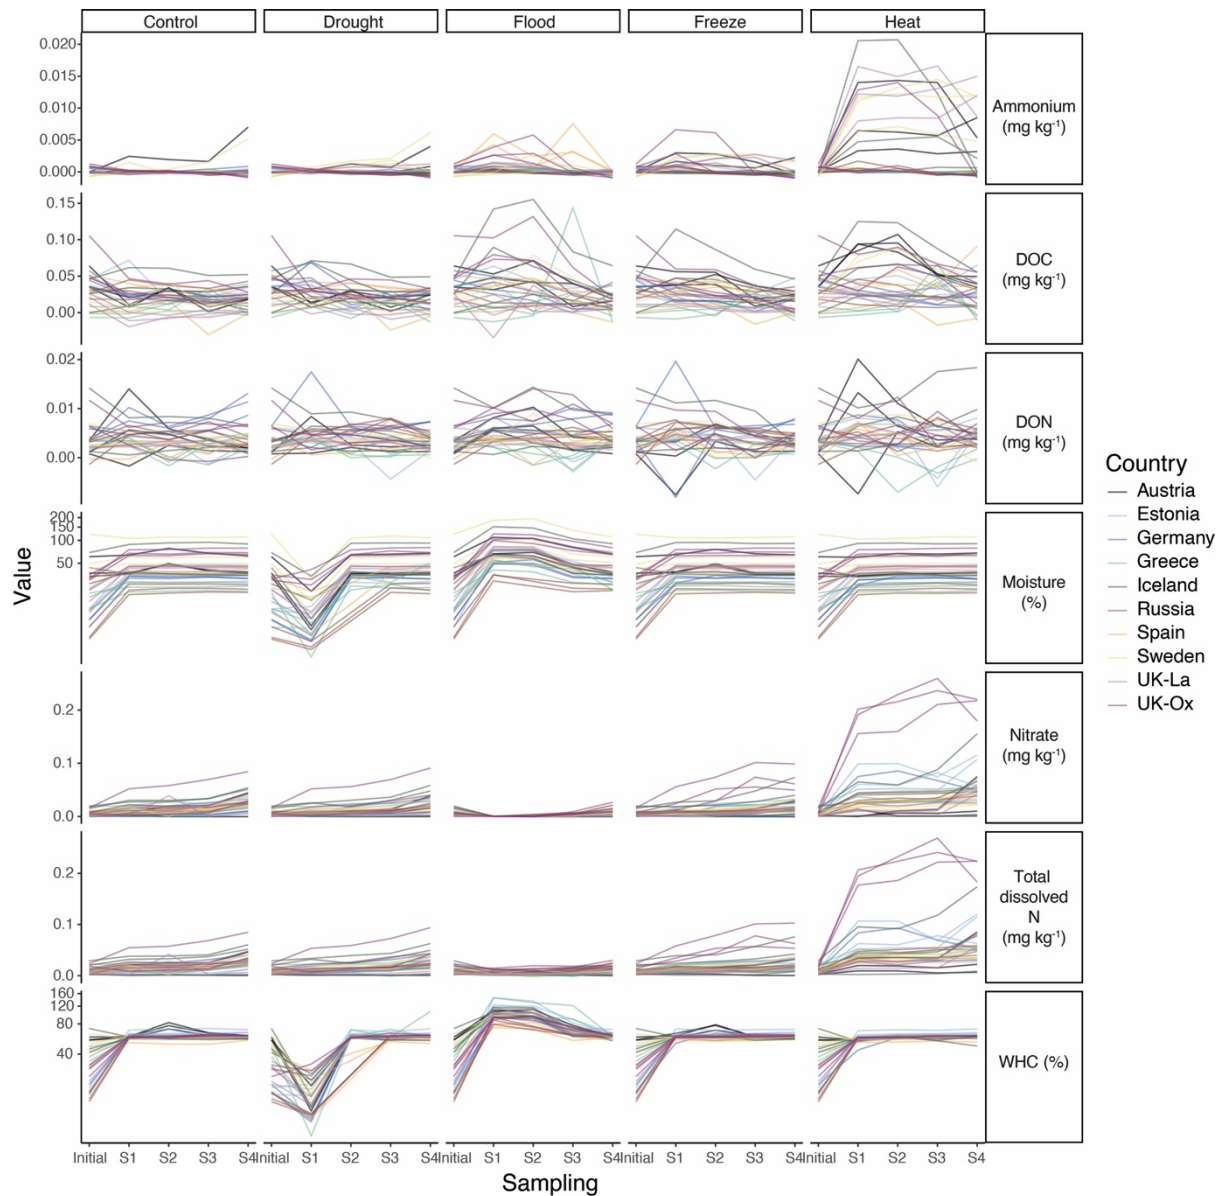

**Supplementary Figure 1. Soil properties of soils from different sites in response to the different disturbances over time.** Laboratory measurements of key soil properties in the initial samples and four subsequent time points in control and disturbed samples ( $N = 5,180$  individual measurements, see Fig. 1 for timings). Lines link measurements of soils from the same sites, the colours of which indicate countries as in Fig. 1. Note the pseudo-logarithmic scale which includes zero, but is logarithmic at higher values. Further details of the underlying data are available at the Figshare site: <https://doi.org/ngfr>

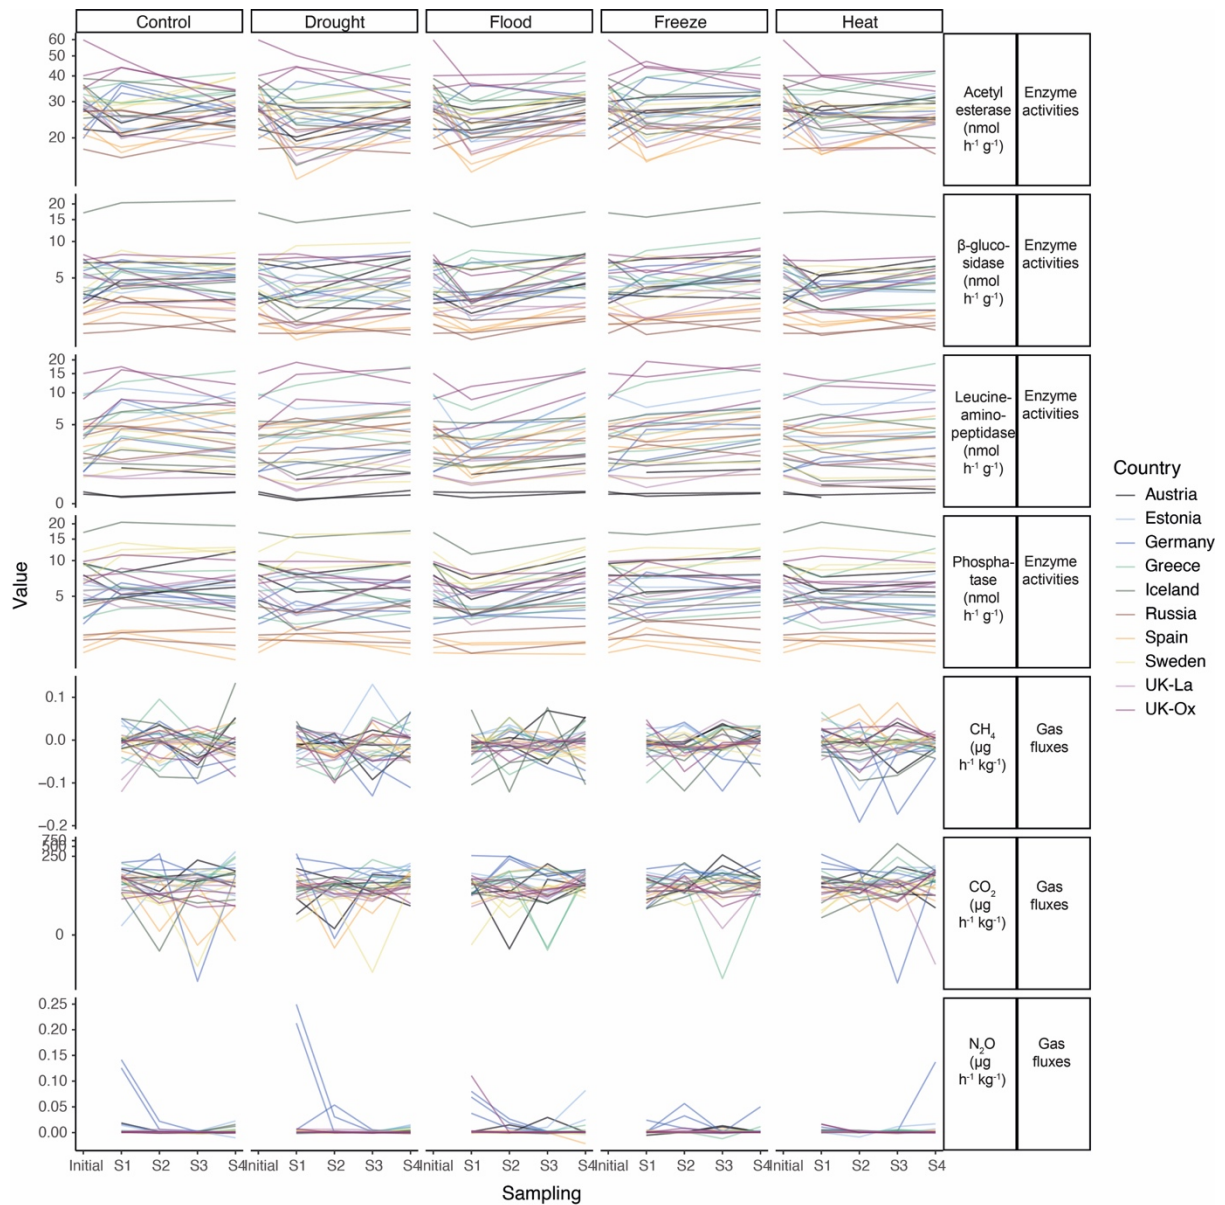

**Supplementary Figure 2. Enzyme activities and gas fluxes of soils from different sites in response to the different disturbances over time.** Laboratory measurements of enzymes and gas fluxes in the initial samples and up to four subsequent time points in control and disturbed samples ( $N = 3,404$  individual measurements see Fig. 1 for timings). Lines link measurements of soils from the same sites, the colours of which indicate countries as in Fig. 1. Note the pseudo-logarithmic scale which includes zero, but is logarithmic at higher values. Further details of the underlying data are available at the Figshare site: <https://doi.org/ngfr>

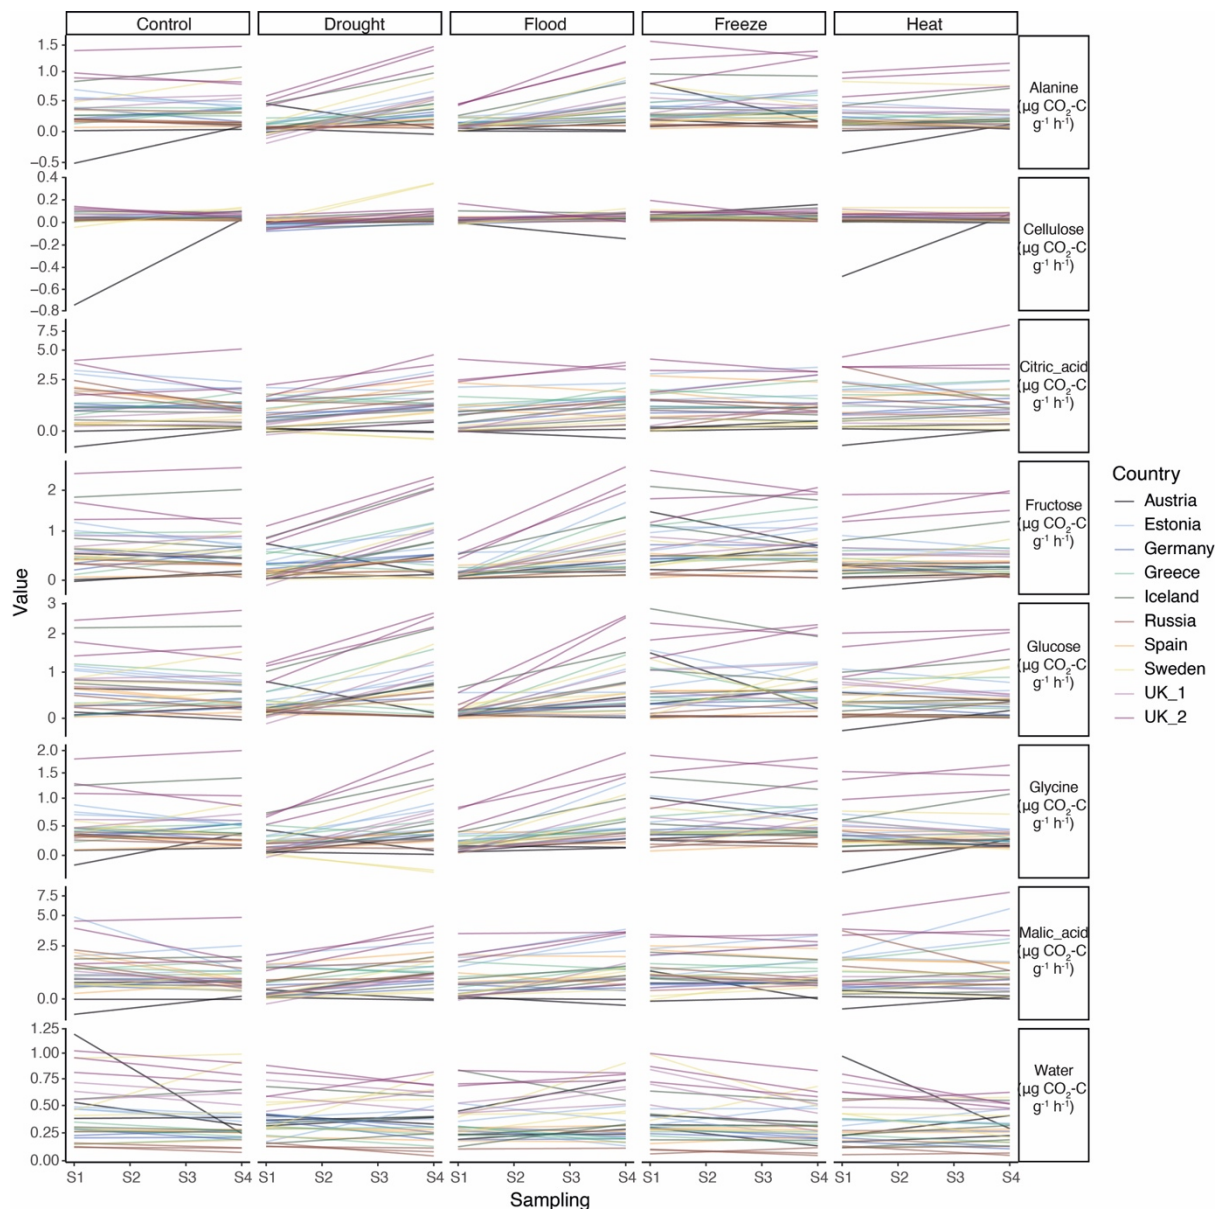

**Supplementary Figure 3. Substrate-induced respiration of soils from different sites in response to the different disturbances over time.** Laboratory MicroResp measurements at the S1 and S4 time points in control and disturbed samples ( $N = 2,373$  individual measurements, see Fig. 1 for timings). Lines link measurements of soils from the same sites, the colours of which indicate countries as in Fig. 1. Note the pseudo-logarithmic scale which includes zero, but is logarithmic at higher values. Further details of the underlying data are available at the Figshare site: <https://doi.org/ngfr>

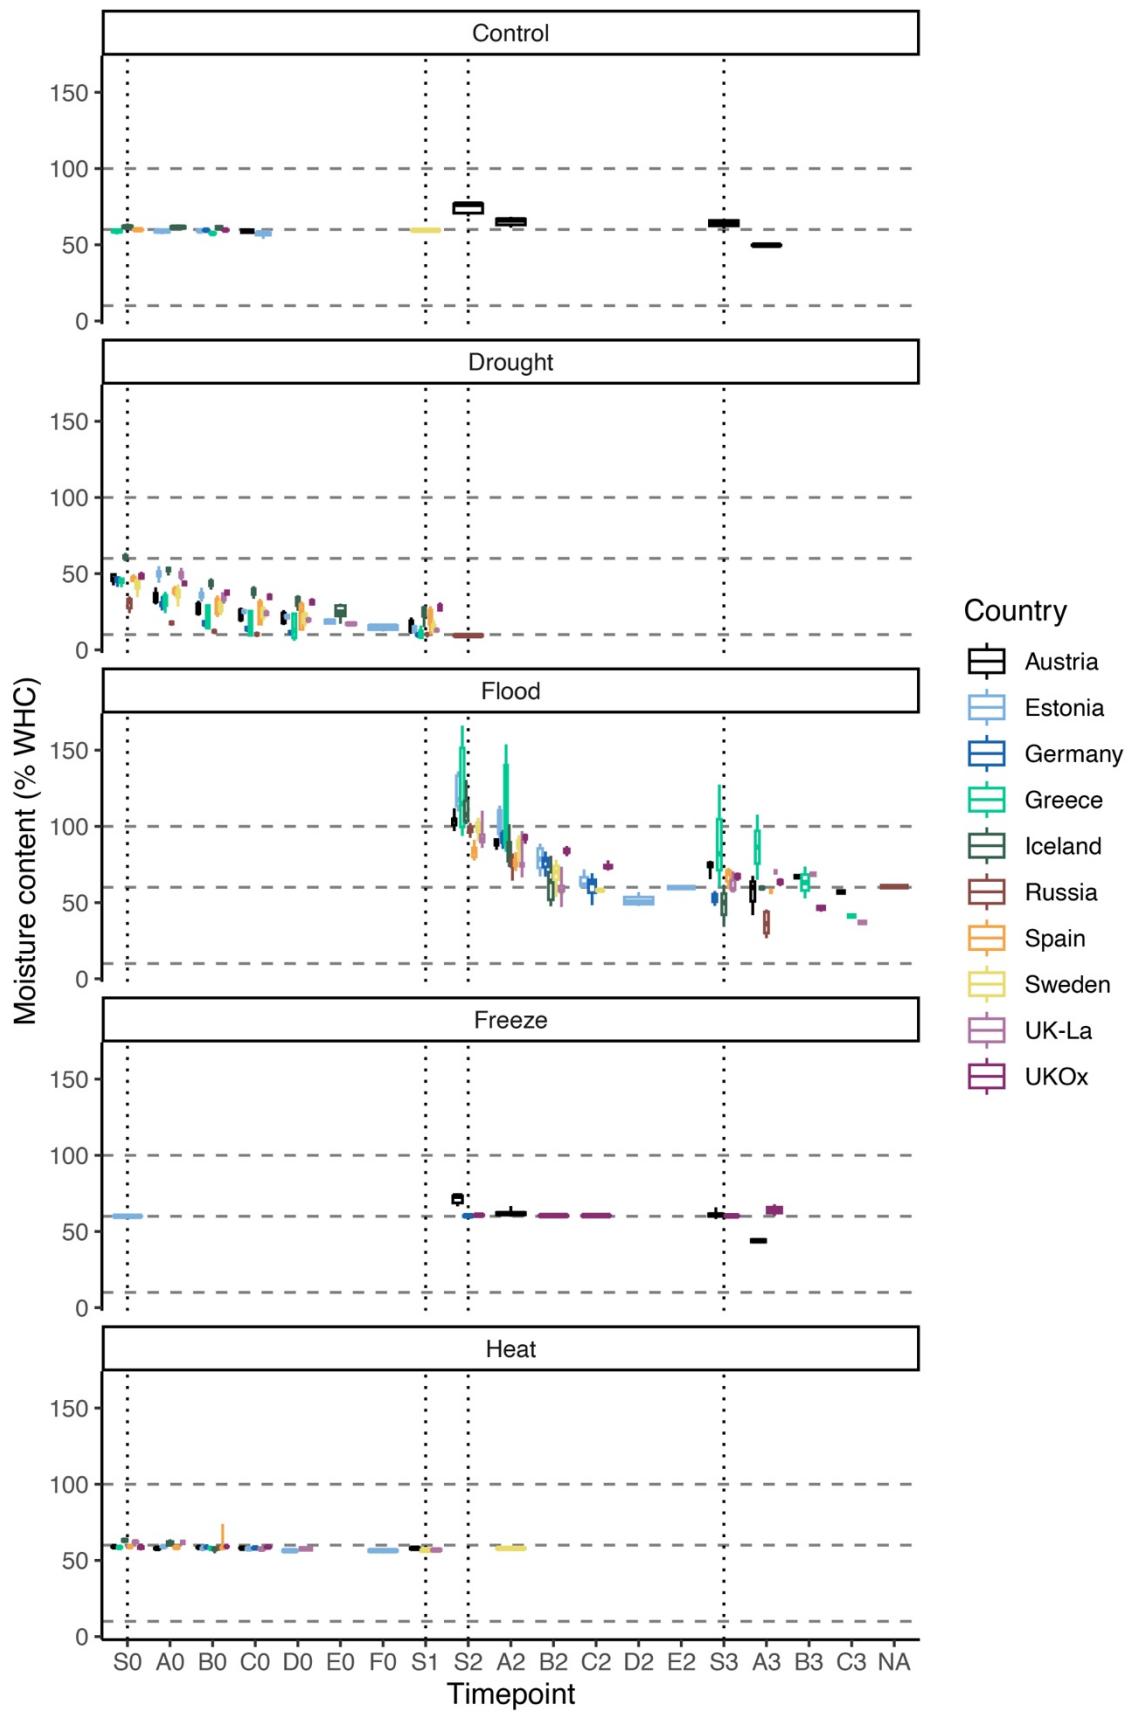

**Supplementary Figure 4. Moisture dynamics.** Soil moisture content as a percentage of the soil water holding capacity (WHC), through the experiment ( $N = 1,284$  individual

measurements). 10%, 60% and 100% of WHC are indicated by horizontal dashes. Vertical dotted lines indicate the start of the perturbation (S0), the end of the perturbation (S1), one day after the end of the perturbation (S2) and one week after the end of the perturbation (S3). Other measurements were taken every 2-3 days for drought and flood treatments through the disturbance and recovery periods respectively (Fig. 1b) and are simply labelled sequentially A0-F0 for the period following S0 and similarly starting with A2 and A3 following S2 and S3 respectively. Colours represent countries as in Fig. 1. Box plots show the full range (whiskers) and the interquartile range (box) across sites within a treatment at a particular timepoint. This includes both different sites from the same country and different pots from the same site destined to be sampled at different time points (i.e. up to 4 pots of each soil in the period before S1, but only one pot following S3 when the S1, S2 and S3 pots had already been sampled). Note that for treatments/ periods during which weights were kept constant, e.g. during freezing and flood, and during recovery when 60% WHC was reached, typically weights were not recorded at each watering date.
