# Supplementary material for: Soil microbiomes show consistent and predictable responses to extreme events
Source: PubMed Central journal article supplement (PMC11655354; doi:10.1038/s41586-024-08185-3), 2024-11-27
Supplement: 41586_2024_8185_MOESM2_ESM.pdf [file 41586_2024_8185_MOESM2_ESM.pdf]

## Reporting Summary

Nature Portfolio wishes to improve the reproducibility of the work that we publish. This form provides structure for consistency and transparency in reporting. For further information on Nature Portfolio policies, see our [Editorial Policies](#) and the [Editorial Policy Checklist](#).

### Statistics

For all statistical analyses, confirm that the following items are present in the figure legend, table legend, main text, or Methods section.

- | n/a                                 | Confirmed                                                                                                                                                                                                                                                                                      |
|-------------------------------------|------------------------------------------------------------------------------------------------------------------------------------------------------------------------------------------------------------------------------------------------------------------------------------------------|
| <input type="checkbox"/>            | <input checked="" type="checkbox"/> The exact sample size ( $n$ ) for each experimental group/condition, given as a discrete number and unit of measurement                                                                                                                                    |
| <input type="checkbox"/>            | <input checked="" type="checkbox"/> A statement on whether measurements were taken from distinct samples or whether the same sample was measured repeatedly                                                                                                                                    |
| <input type="checkbox"/>            | <input checked="" type="checkbox"/> The statistical test(s) used AND whether they are one- or two-sided<br><i>Only common tests should be described solely by name; describe more complex techniques in the Methods section.</i>                                                               |
| <input type="checkbox"/>            | <input checked="" type="checkbox"/> A description of all covariates tested                                                                                                                                                                                                                     |
| <input type="checkbox"/>            | <input checked="" type="checkbox"/> A description of any assumptions or corrections, such as tests of normality and adjustment for multiple comparisons                                                                                                                                        |
| <input type="checkbox"/>            | <input checked="" type="checkbox"/> A full description of the statistical parameters including central tendency (e.g. means) or other basic estimates (e.g. regression coefficient) AND variation (e.g. standard deviation) or associated estimates of uncertainty (e.g. confidence intervals) |
| <input type="checkbox"/>            | <input checked="" type="checkbox"/> For null hypothesis testing, the test statistic (e.g. $F$ , $t$ , $r$ ) with confidence intervals, effect sizes, degrees of freedom and $P$ value noted<br><i>Give <math>P</math> values as exact values whenever suitable.</i>                            |
| <input checked="" type="checkbox"/> | <input type="checkbox"/> For Bayesian analysis, information on the choice of priors and Markov chain Monte Carlo settings                                                                                                                                                                      |
| <input type="checkbox"/>            | <input checked="" type="checkbox"/> For hierarchical and complex designs, identification of the appropriate level for tests and full reporting of outcomes                                                                                                                                     |
| <input type="checkbox"/>            | <input checked="" type="checkbox"/> Estimates of effect sizes (e.g. Cohen's $d$ , Pearson's $r$ ), indicating how they were calculated                                                                                                                                                         |

*Our web collection on [statistics for biologists](#) contains articles on many of the points above.*

### Software and code

Policy information about [availability of computer code](#)

|                 |                                                                                                                                                                                                                                                                                                                                                                                                                                                                                                                                                                                                                                                 |
|-----------------|-------------------------------------------------------------------------------------------------------------------------------------------------------------------------------------------------------------------------------------------------------------------------------------------------------------------------------------------------------------------------------------------------------------------------------------------------------------------------------------------------------------------------------------------------------------------------------------------------------------------------------------------------|
| Data collection | Data collection not involving software                                                                                                                                                                                                                                                                                                                                                                                                                                                                                                                                                                                                          |
| Data analysis   | <p>Most analysis was carried out with R version 4.2, using the following key packages:<br/>           broom.mixed 0.2, caper 1.0, car 3.1, cowplot 1.1, DADA2 1.24, DECIPHER 2.24, eulerr 7.0, fs 1.6, ggdiplots 0.4, ggplot 3.3, ggrepel 0.9, Hmisc 5.1, lme4 1.1, lmerTest 3.1, magrittr 2.0, MASS 7.3, multcomp 1.4, nlme 3.1, pacman 0.5, pals 1.9, pdp 0.8, pracma 2.4, randomForest 4.7, RasterGade16S 0.0, RColorBrewer 1.1, seqinr 4.2, tidyverse 2.0, vegan 2.6</p> <p>In addition, the following stand-alone software was utilised<br/>           FastTree (2.1)<br/>           Diamond (0.8 and 2.0)<br/>           BLAST (2.13)</p> |

For manuscripts utilizing custom algorithms or software that are central to the research but not yet described in published literature, software must be made available to editors and reviewers. We strongly encourage code deposition in a community repository (e.g. GitHub). See the Nature Portfolio [guidelines for submitting code & software](#) for further information.

## Data

Policy information about [availability of data](#)

All manuscripts must include a [data availability statement](#). This statement should provide the following information, where applicable:

- Accession codes, unique identifiers, or web links for publicly available datasets
- A description of any restrictions on data availability
- For clinical datasets or third party data, please ensure that the statement adheres to our [policy](#)

All raw sequence files are deposited in the European Nucleotide Archive at project accession PRJEB52753, with paired fastq files for each sample under Run accessions ERR9712737-ERR9713356 (16S amplicons); ERR9713357-ERR9713976 (ITS amplicons), and ERR9924623-ERR9924930 (whole genome metagenomes). Derived data and all code are available at <https://doi.org/ngfr> with explicit accessions for the raw data at ENA. Climatic data are available from WorldClim.org

## Human research participants

Policy information about [studies involving human research participants and Sex and Gender in Research](#).

Reporting on sex and gender

NA

Population characteristics

NA

Recruitment

NA

Ethics oversight

NA

Note that full information on the approval of the study protocol must also be provided in the manuscript.

## Field-specific reporting

Please select the one below that is the best fit for your research. If you are not sure, read the appropriate sections before making your selection.

Life sciences  Behavioural & social sciences  Ecological, evolutionary & environmental sciences

For a reference copy of the document with all sections, see [nature.com/documents/nr-reporting-summary-flat.pdf](https://nature.com/documents/nr-reporting-summary-flat.pdf)

## Ecological, evolutionary & environmental sciences study design

All studies must disclose on these points even when the disclosure is negative.

Study description

The experiment was a factorial design between treatment (a factor with five levels) and sampling time (a factor with four levels, S1-S4, though some analyses only used S1 and S4 and there was also an Initial sample for each soil). A nested sampling approach was taken with three replicate sites sampled within each of 10 countries. A single pot of soil was utilised for each replicate site at each sampling time in each treatment.

Research sample

Samples from each replicate site comprised 4 pooled 3cm diameter x 15cm long soil cores

Sampling strategy

For a fixed number of samples to be analysed, the strategy was to maximise the diversity of soils sampled. This results in the design with a single sample for each soil/treatment/time combination.

Data collection

Laboratory data collection on soils carried out in Manchester by ON, CW and HL with sequencing data collected by CGR, Liverpool and the UK Centre for Ecology and Hydrology (RIG, TG and BJ)

Timing and spatial scale

Samples were collected when the average temperature of the location was closest to 18 °C, i.e. in spring for southern locations, and after the snow melt, in summer, for the northern locations. In May 2018, we collected soil from Russia, Greece, and Estonia and Spain, followed by Germany and Oxford in June, Austria and Iceland in July, and Lancaster and Sweden in August. Three spatial scales were used – European country-scale shown in Supplementary Fig. 1; replicate sites within countries, separated by 0.05 – 11.76 km; cores within sites, taken from four random points within seven 1 m x 1 m plots were arranged at least 5 m apart.

Data exclusions

Two replicate sites from Spain (sites 1 and 3; n = 42) were excluded from the analyses due to low DNA yield and poor recovery of reads particularly for the prokaryotic amplicons

Reproducibility

The clustering of replicate sites in Fig. 1 demonstrates reproducibility.

Randomization

Location of soil cores within plots were randomised; assignment of soil samples to treatments was done randomly; physical locations of microcosms on trays was randomised.

- Blinding
- Did the study involve field work?  Yes  No

## Field work, collection and transport

- Field conditions
- Location
- Access & import/export
- Disturbance

## Reporting for specific materials, systems and methods

We require information from authors about some types of materials, experimental systems and methods used in many studies. Here, indicate whether each material, system or method listed is relevant to your study. If you are not sure if a list item applies to your research, read the appropriate section before selecting a response.

### Materials & experimental systems

- | n/a                                 | Involvement in the study                               |
|-------------------------------------|--------------------------------------------------------|
| <input checked="" type="checkbox"/> | <input type="checkbox"/> Antibodies                    |
| <input checked="" type="checkbox"/> | <input type="checkbox"/> Eukaryotic cell lines         |
| <input checked="" type="checkbox"/> | <input type="checkbox"/> Palaeontology and archaeology |
| <input checked="" type="checkbox"/> | <input type="checkbox"/> Animals and other organisms   |
| <input checked="" type="checkbox"/> | <input type="checkbox"/> Clinical data                 |
| <input checked="" type="checkbox"/> | <input type="checkbox"/> Dual use research of concern  |

### Methods

- | n/a                                 | Involvement in the study                        |
|-------------------------------------|-------------------------------------------------|
| <input checked="" type="checkbox"/> | <input type="checkbox"/> ChIP-seq               |
| <input checked="" type="checkbox"/> | <input type="checkbox"/> Flow cytometry         |
| <input checked="" type="checkbox"/> | <input type="checkbox"/> MRI-based neuroimaging |
