# Supplementary material for: Soil microbiomes show consistent and predictable responses to extreme events
Source: PubMed Central journal article supplement (PMC11655354; doi:10.1038/s41586-024-08185-3), 2024-11-27
Supplement: 41586_2024_8185_MOESM5_ESM.pdf [file 41586_2024_8185_MOESM5_ESM.pdf]

Amino Acids and Derivatives

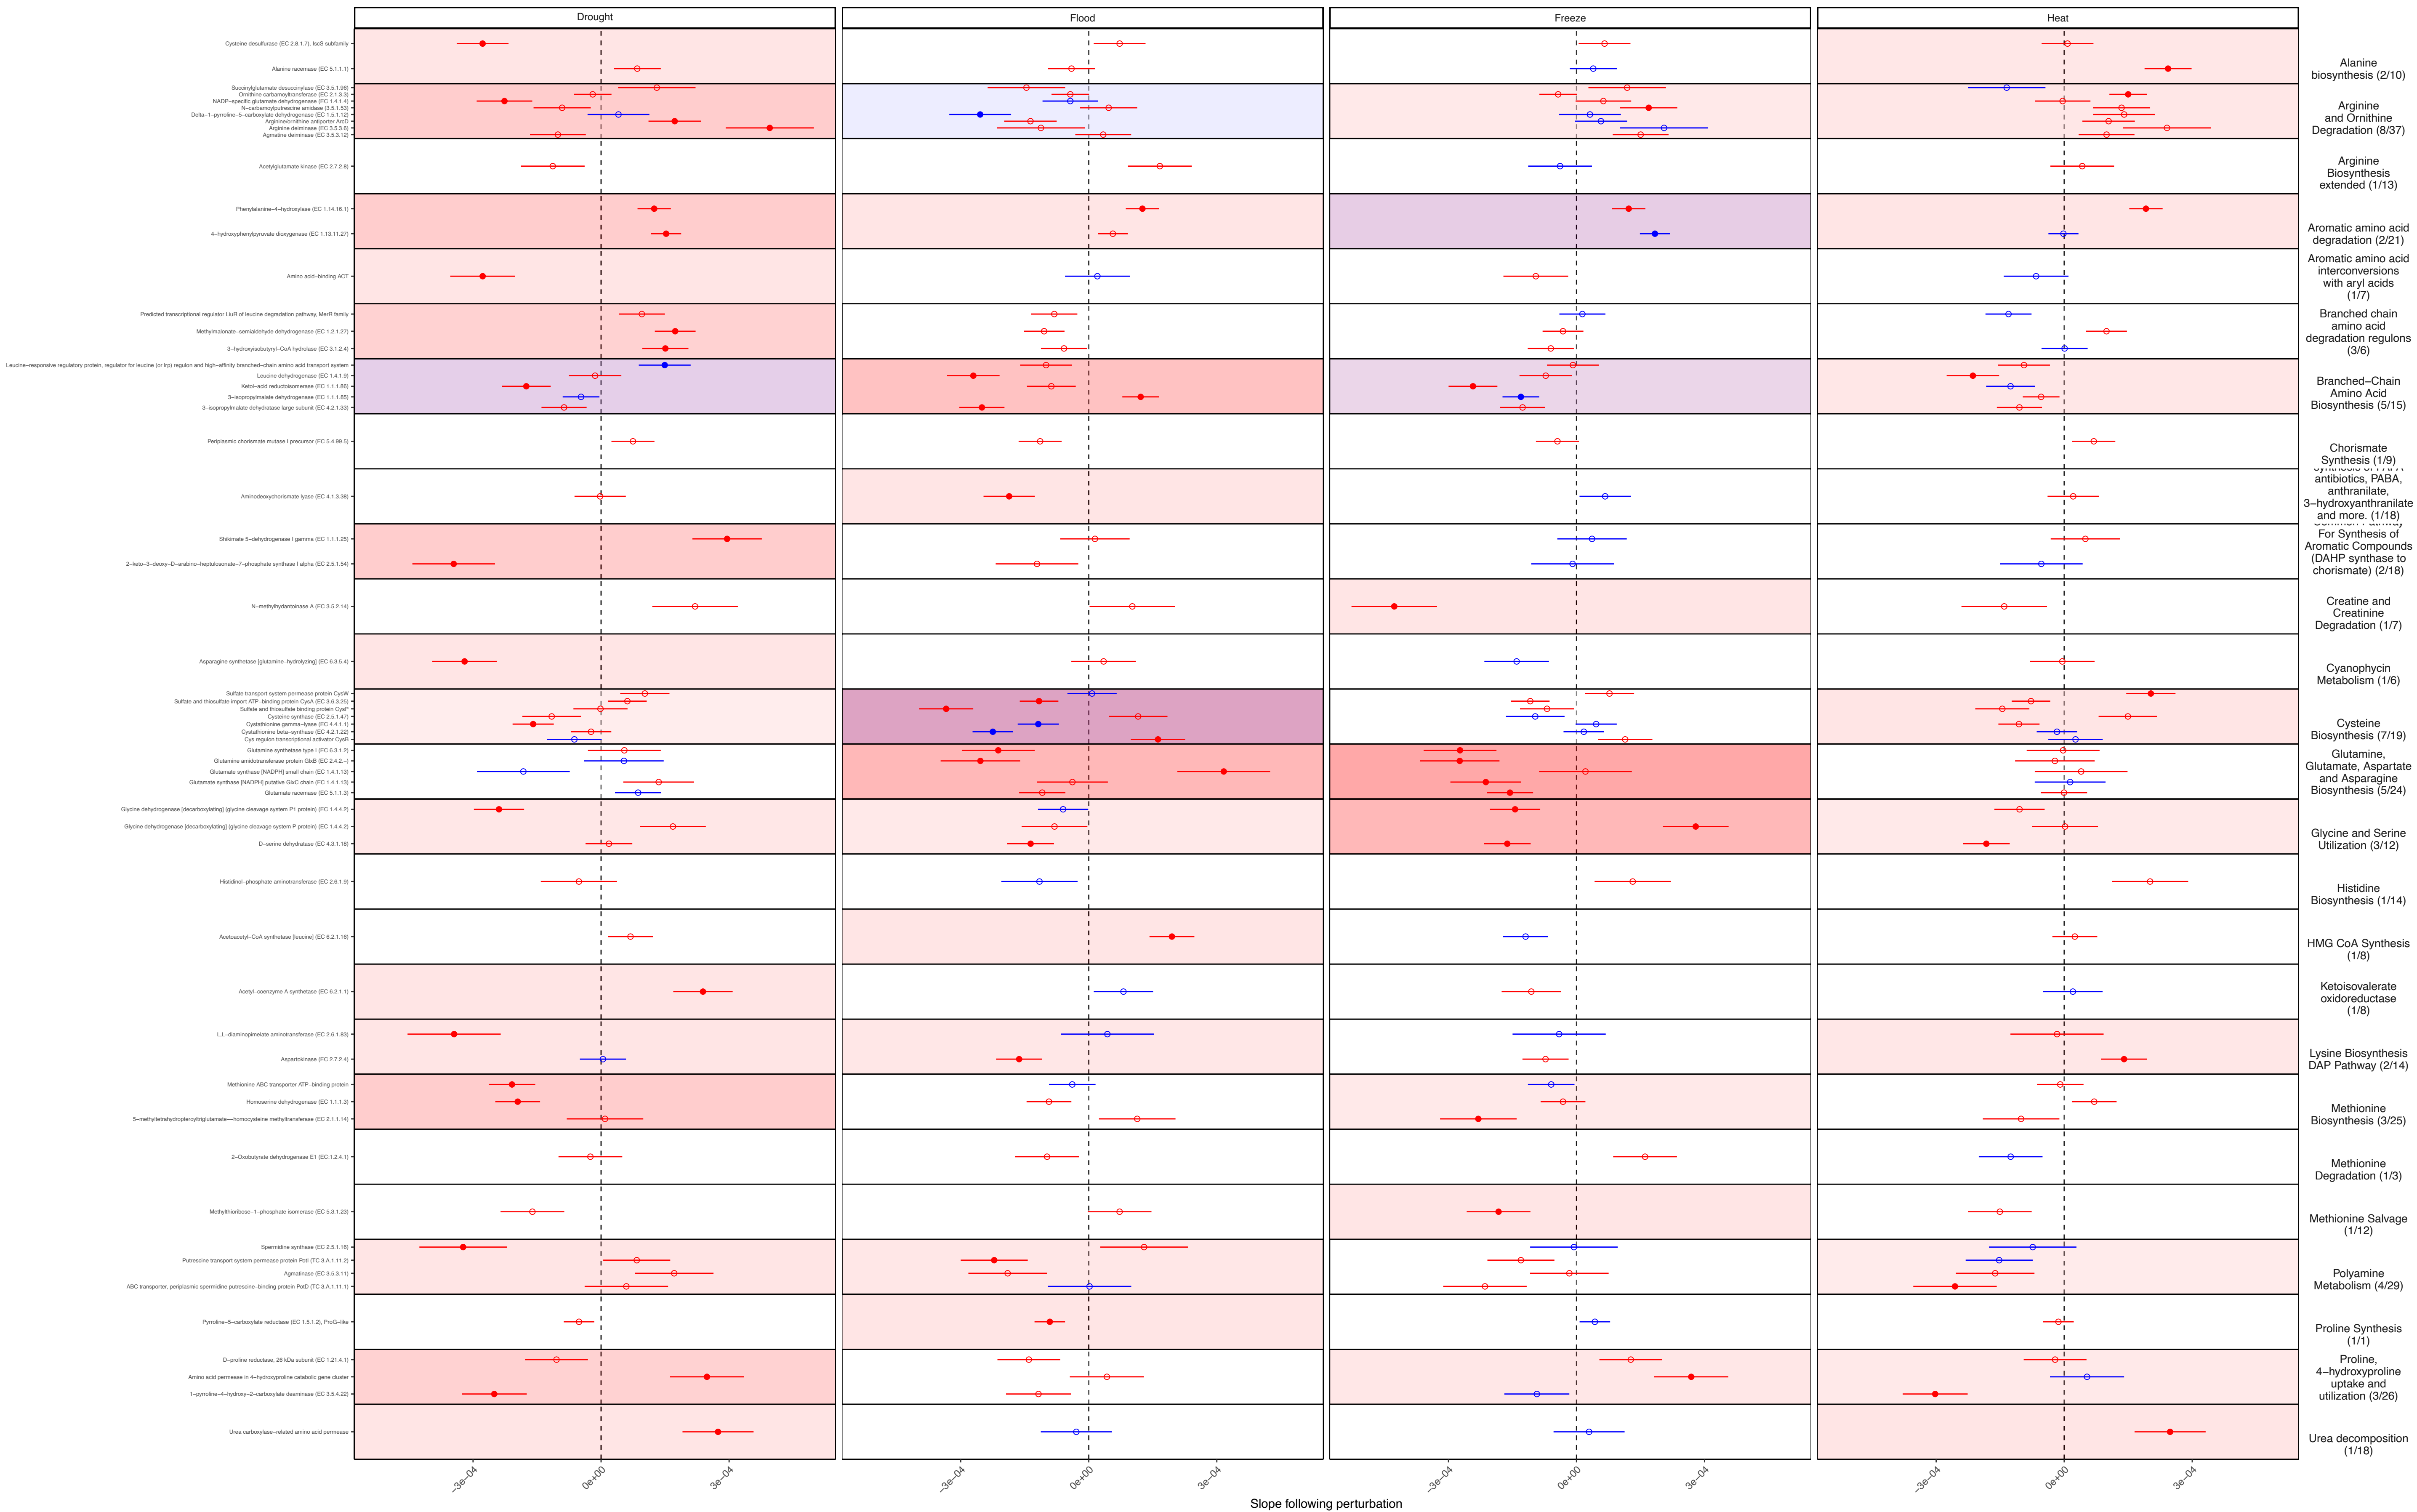

Carbohydrates

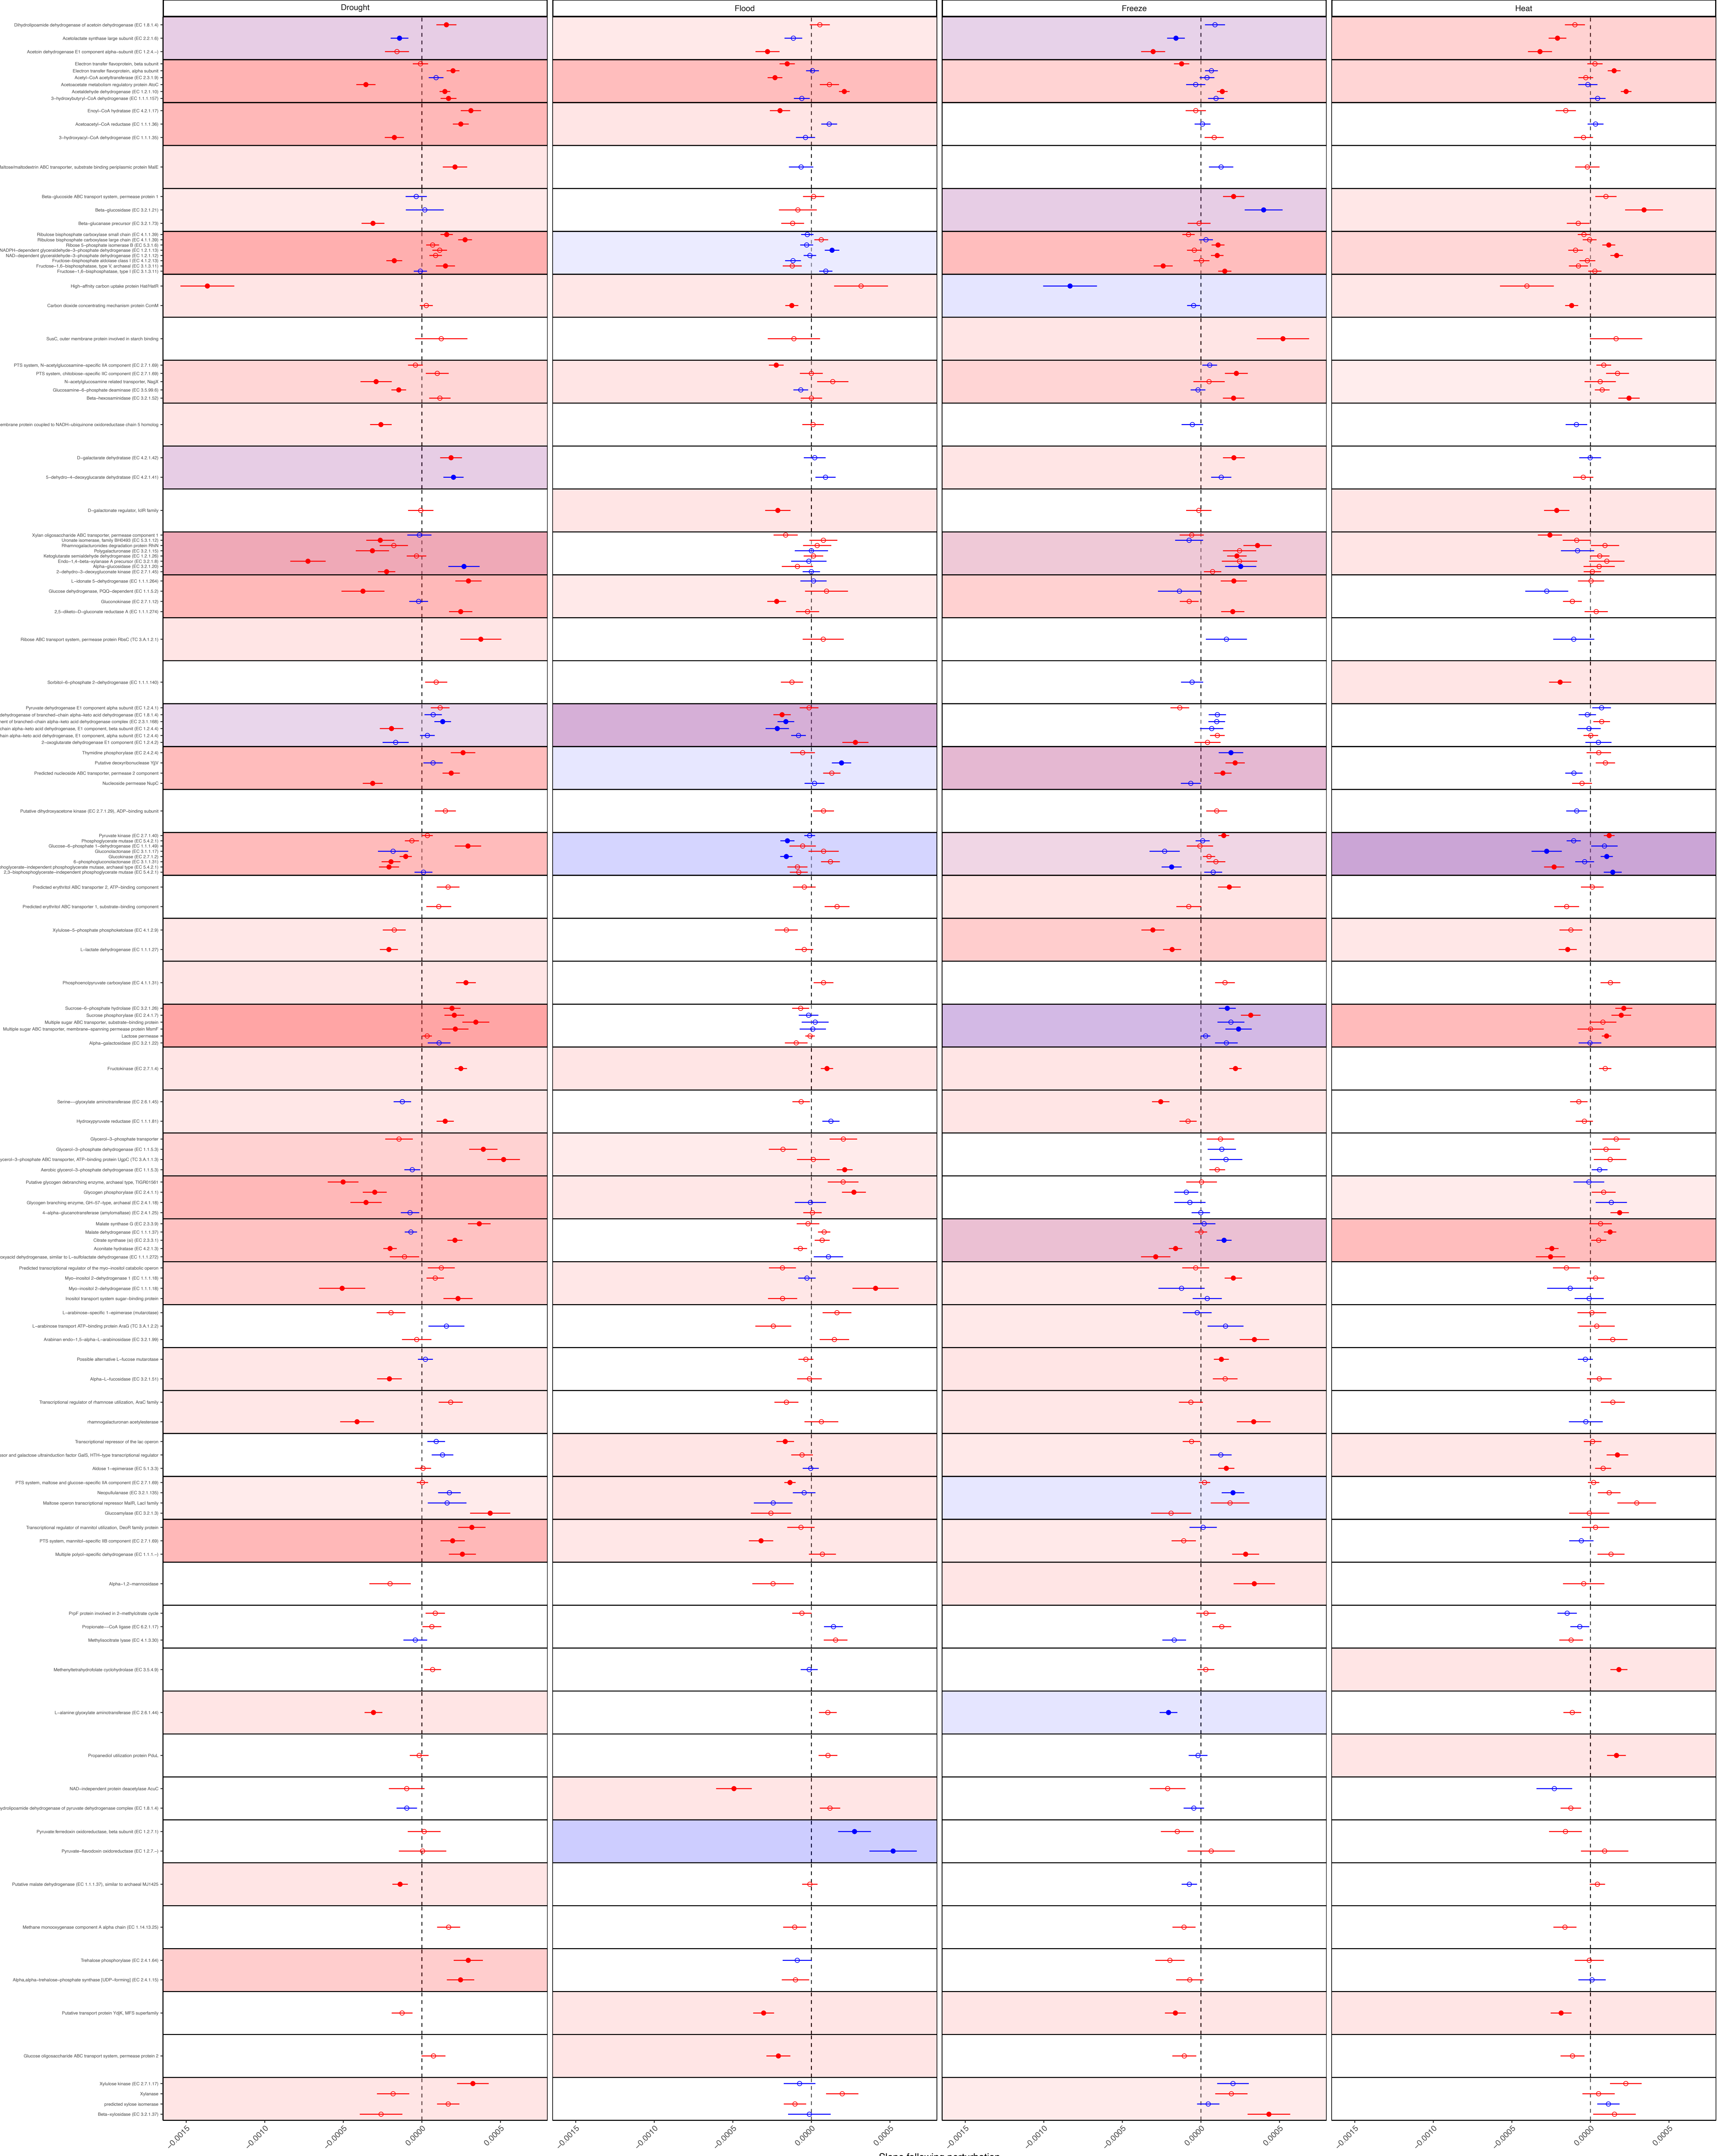

- Acetoin, butanediol metabolism (3/10)
- Acetone Butanol Ethanol Synthesis (6/2)
- Acetyl-CoA fermentation to Butyrate (3/16)
- Alpha-Amylase locus in Streptococcus (1/3)
- Beta-Glucoside Metabolism (3/47)
- Calvin-Benson cycle (8/22)
- Carboxysome (2/4)
- Cellulose (1/9)
- Chitin and N-acetylglucosamine utilization (5/38)
- CO2 uptake, carboxysome (1/27)
- D-galactarate, D-glucarate and D-glycerate catabolism (2/12)
- D-galactonate catabolism (1/6)
- D-Galacturonate and D-Glucuronate Utilization (8/46)
- D-glucuronate and ketogluconates metabolism (4/33)
- D-ribose utilization (1/11)
- D-Sorbitol(D-Glucitol) and L-Sorbose Utilization (1/15)
- Dihydroxyacetone complexes (1/27)
- Deoxyribose and Deoxynucleoside Catabolism (4/15)
- Dihydroxyacetone kinases (1/10)
- Entner-Doudoroff Pathway (8/16)
- Erythritol utilization (2/13)
- Fermentations: Lactate (2/3)
- Fermentations: Mixed acid (1/5)
- Fructooligosaccharides(FOS) and Raffinose Utilization (6/15)
- Fructose utilization (1/14)
- Glycerate metabolism (2/4)
- Glycerol and Glycerol-3-phosphate Uptake and Utilization (4/21)
- Glycogen metabolism (4/12)
- Glyoxylate bypass (5/11)
- Inositol catabolism (4/23)
- L-Arabinose utilization (3/41)
- L-fucose utilization (2/15)
- L-rhamnose utilization (2/46)
- Lactose and Galactose Uptake and Utilization (3/27)
- Maltose and Maltodextrin Utilization (4/35)
- Mannitol Utilization (3/12)
- Mannose Metabolism (1/41)
- Methylcitrate cycle (3/9)
- One-carbon metabolism by tetrahydropterins (1/5)
- Photorespiration (oxidative C2 cycle) (1/4)
- Propanediol utilization (1/18)
- Pyruvate metabolism II: acetyl-CoA, acetogenesis from pyruvate (2/12)
- Pyruvate ferredoxin oxidoreductase (2/7)
- Serine-glyoxylate cycle (1/18)
- Soluble methane monooxygenase (sMMO) (1/5)
- Trehalose Biosynthesis (2/6)
- carbohydrate utilization (cluster Ydj) (1/14)
- Xyloglucan Utilization (1/8)
- Xylose utilization (4/42)

# Cell Division and Cell Cycle

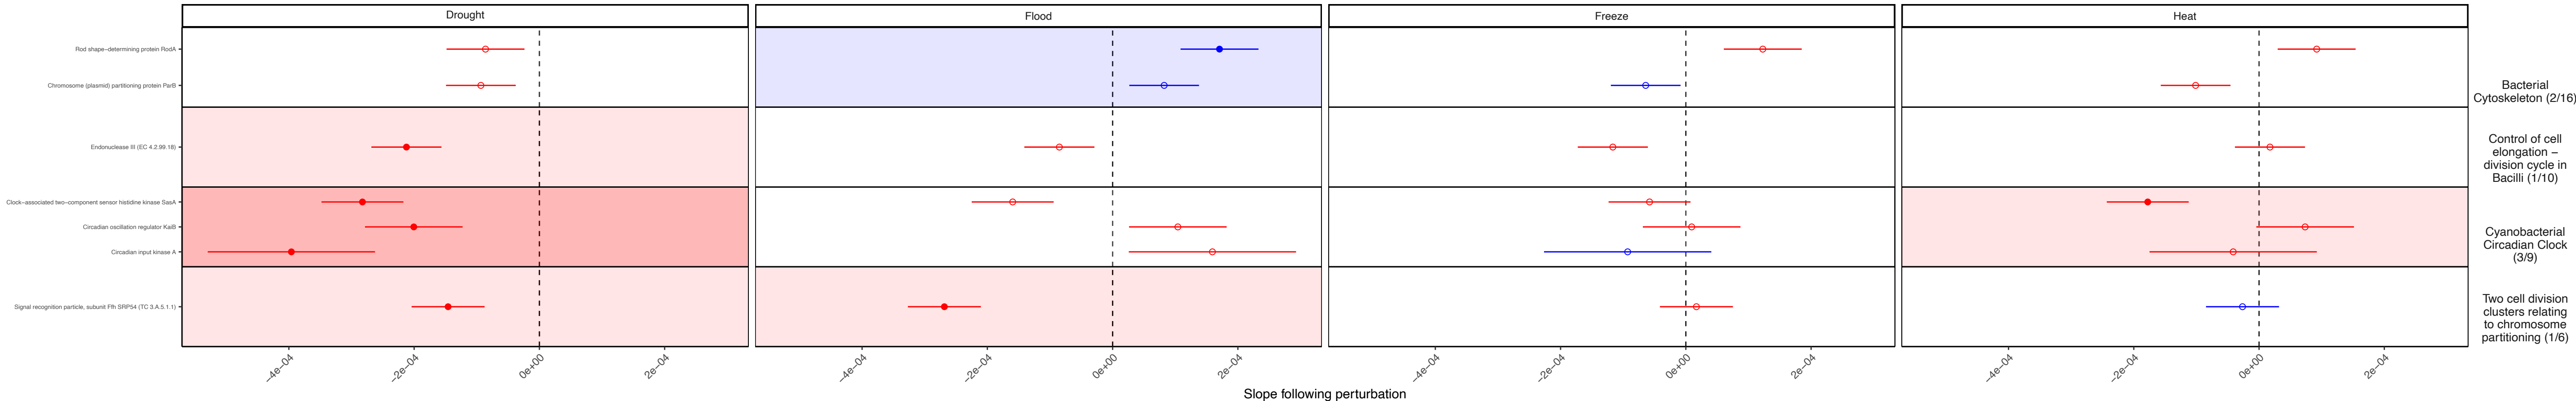

# Cell Wall and Capsule

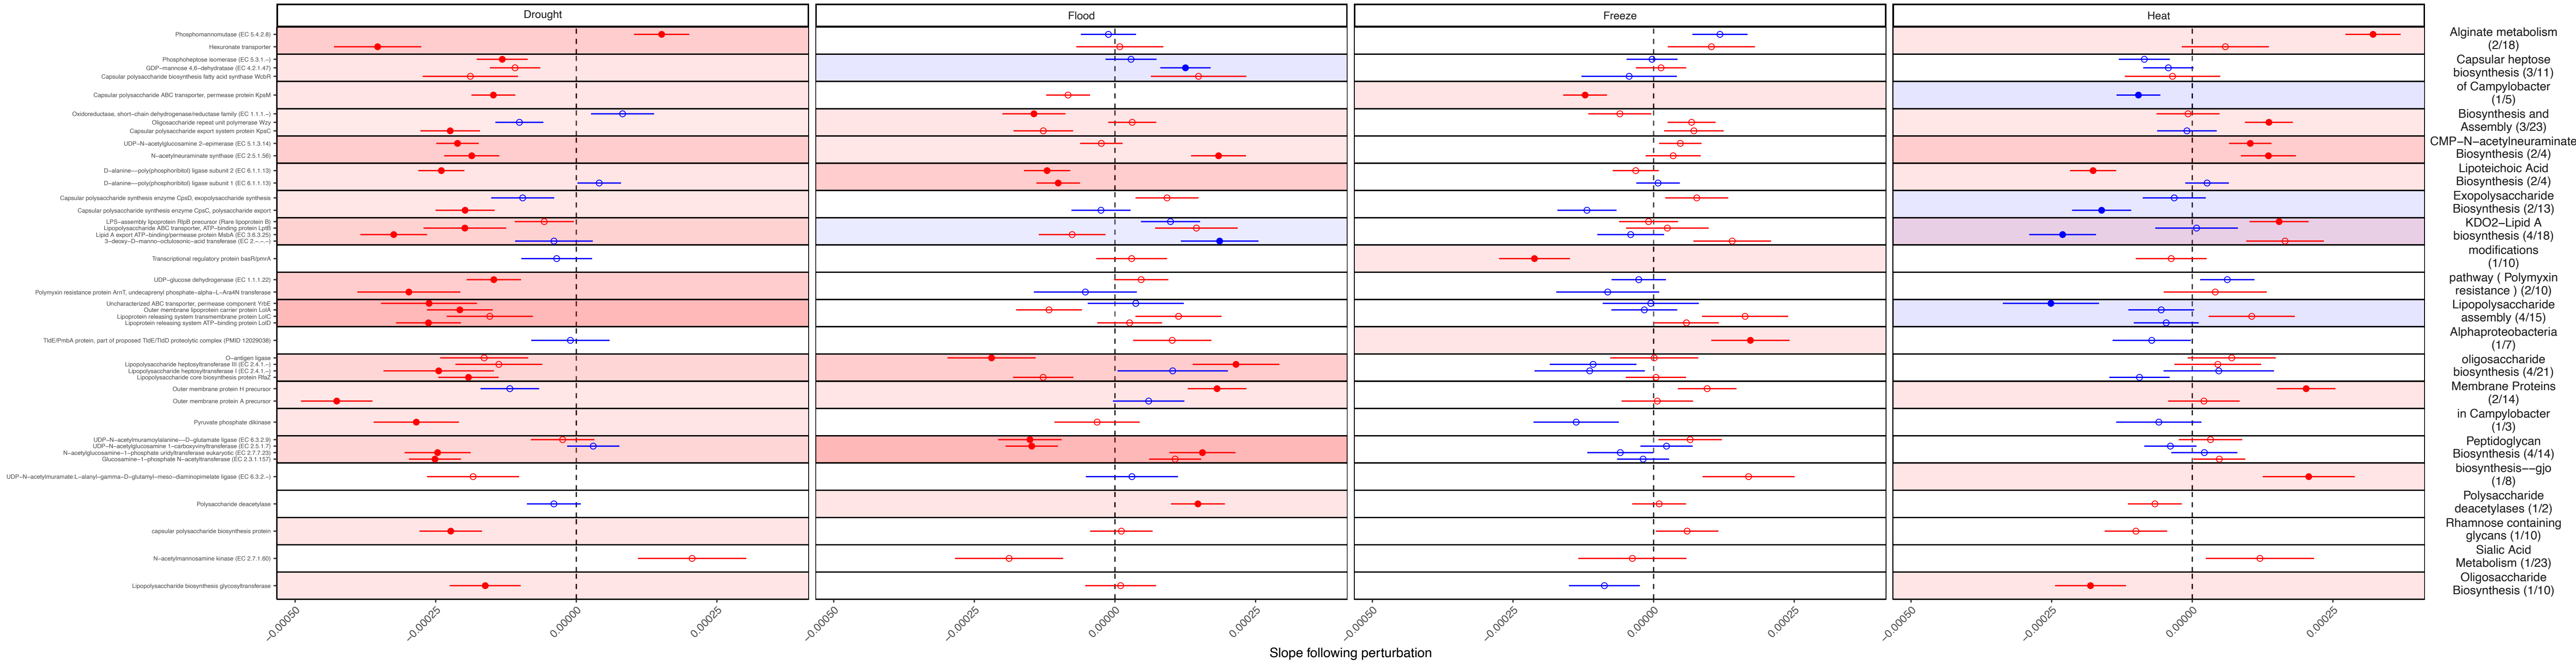

Clustering-based subsystems

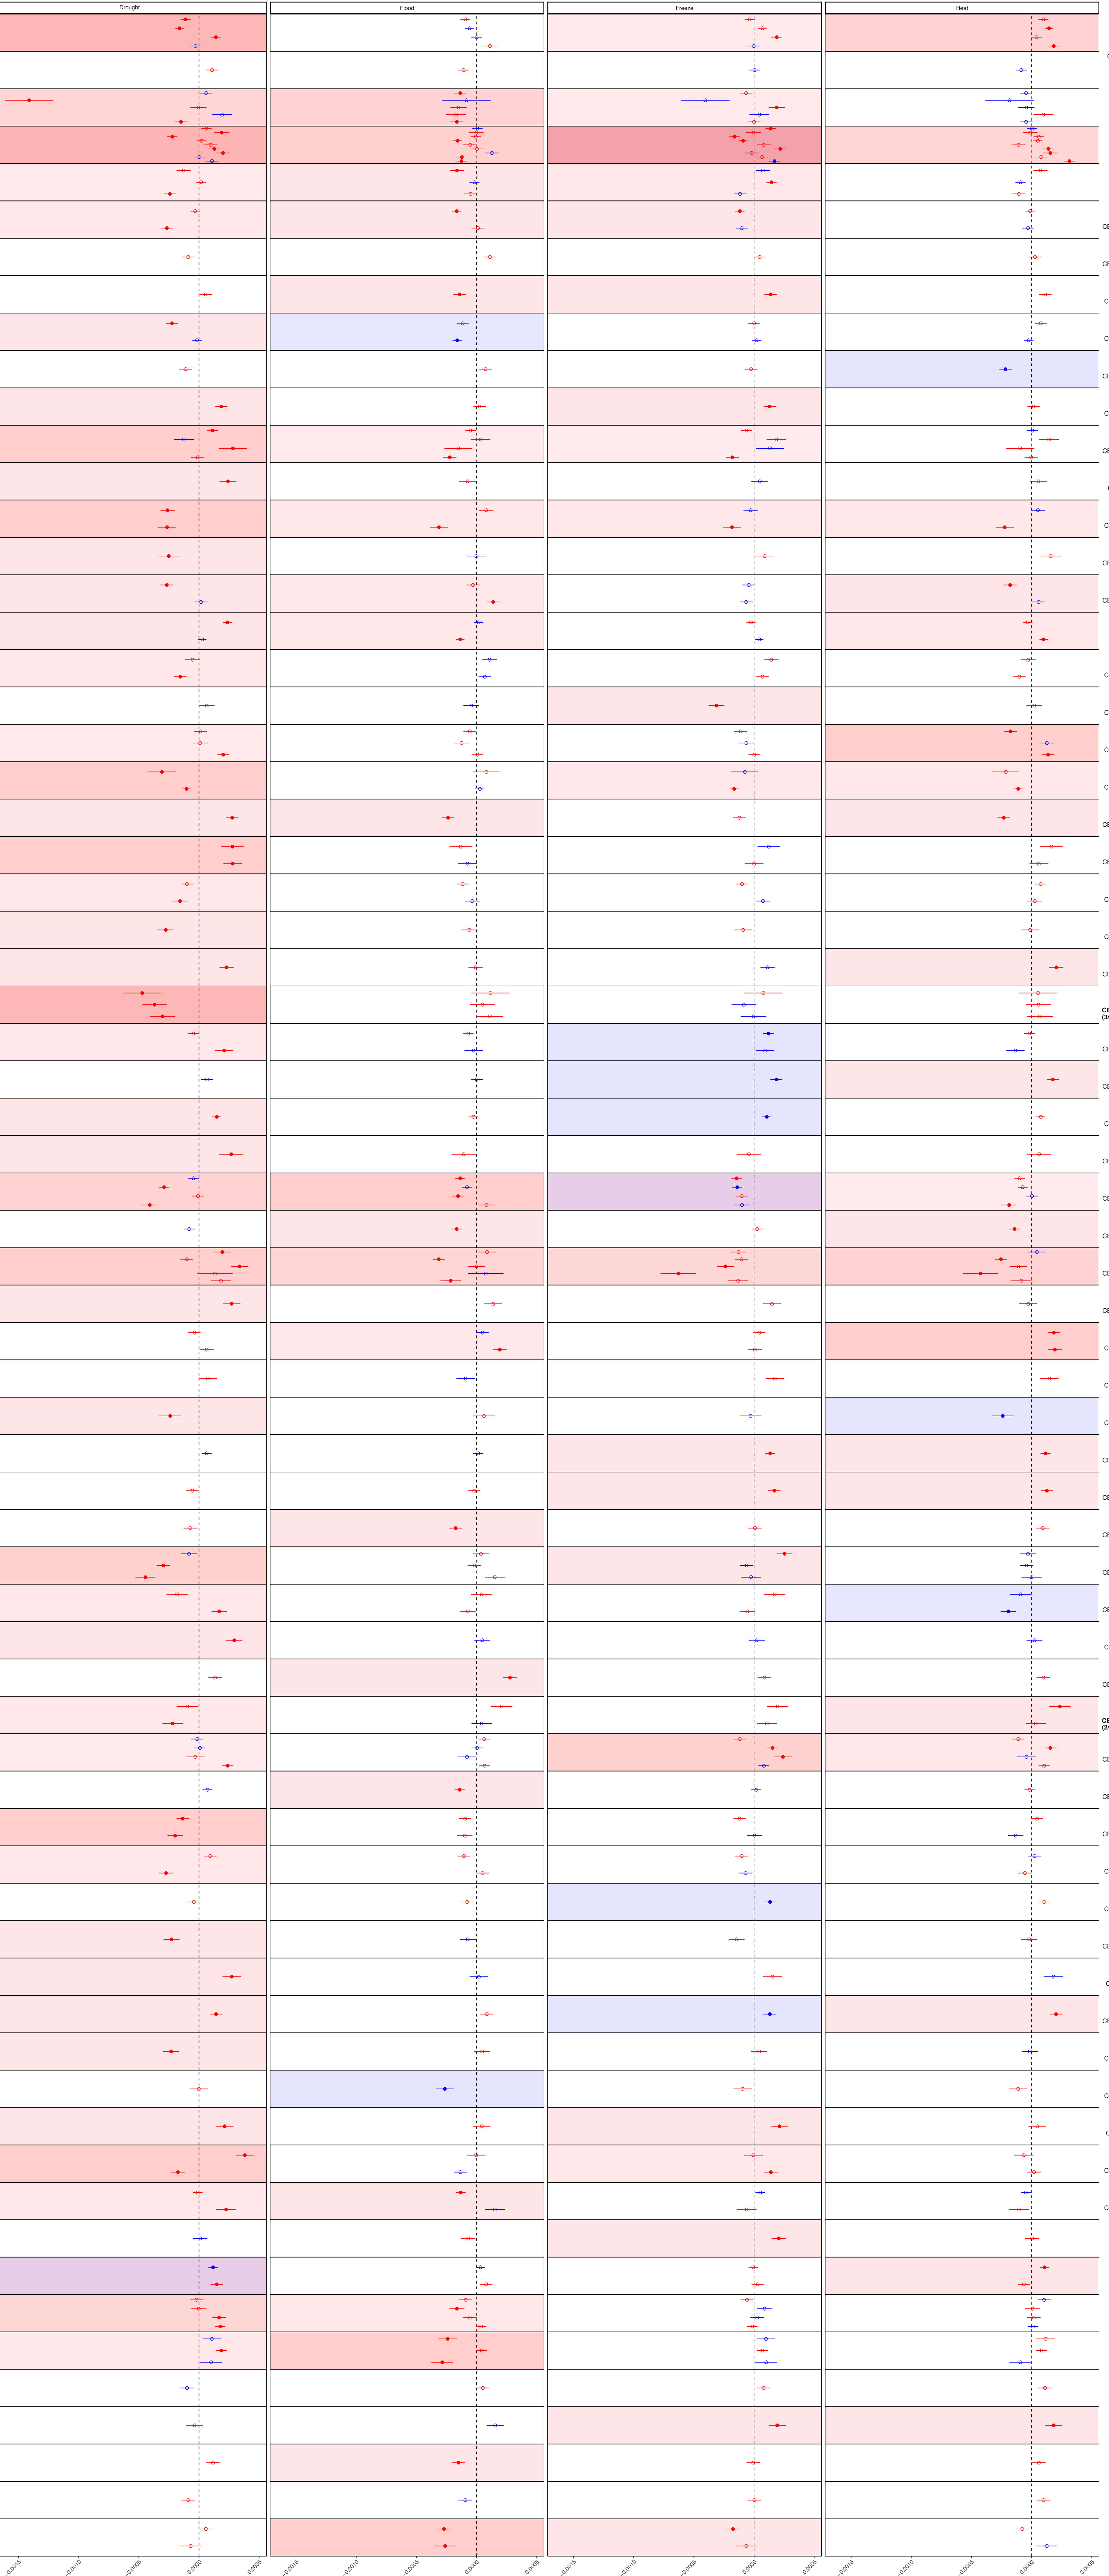

- Gamma-proteobacteria Cluster Relating to Transition (4/8)
- Glutathione-dependent Thiol Reductase Associated with a Step in Lysine Biosynthesis (12)
- cluster that relates ribosomal protein L28P to a set of uncharacterized proteins (5/8)
- Bacterial Cell Division (9/25)
- Bacterial RNA-metabolizing Zn-dependent hydrolases (3/12)
- CBSS-136119.3.pcg.2719 (2/4)
- CBSS-159087.4.pcg.2189 (1/4)
- CBSS-163492.1.pcg.550 (1/4)
- CBSS-176279.3.pcg.868 (2/3)
- CBSS-176280.1.pcg.1561 (1/14)
- CBSS-176299.3.pcg.235 (1/4)
- CBSS-176299.4.pcg.1292 (4/8)
- CBSS-188.1.pcg.6170 (1/4)
- CBSS-196164.1.pcg.461 (2/4)
- CBSS-198094.1.pcg.4426 (1/3)
- CBSS-216592.1.pcg.3534 (2/3)
- CBSS-235.1.pcg.567 (2/9)
- CBSS-243265.1.pcg.198 (2/2)
- CBSS-246196.1.pcg.364 (1/2)
- CBSS-257314.1.pcg.676 (3/12)
- CBSS-257314.1.pcg.752 (2/2)
- CBSS-258594.1.pcg.339 (1/10)
- CBSS-262316.1.pcg.2929 (2/7)
- CBSS-262719.3.pcg.410 (2/5)
- CBSS-265072.7.pcg.546 (1/10)
- CBSS-269482.1.pcg.1294 (1/3)
- CBSS-269799.3.pcg.2220 (3/5)
- CBSS-269821.1.pcg.1715 (2/6)
- CBSS-269821.1.pcg.2186 (1/2)
- CBSS-281090.3.pcg.464 (1/2)
- CBSS-291331.3.pcg.3674 (1/12)
- CBSS-296591.1.pcg.2390 (4/12)
- CBSS-306254.1.pcg.1508 (1/2)
- CBSS-314289.3.pcg.1840 (5/8)
- CBSS-316057.3.pcg.1308 (1/14)
- CBSS-316057.3.pcg.563 (2/3)
- CBSS-316273.3.pcg.448 (1/5)
- CBSS-316273.3.pcg.922 (1/6)
- CBSS-316407.3.pcg.1371 (1/3)
- CBSS-320572.3.pcg.6046 (1/3)
- CBSS-323850.3.pcg.3269 (1/4)
- CBSS-326442.4.pcg.1852 (3/12)
- CBSS-342610.3.pcg.1536 (2/4)
- CBSS-342610.3.pcg.283 (1/2)
- CBSS-344610.3.pcg.2335 (1/5)
- CBSS-345672.3.pcg.1318 (2/8)
- CBSS-350688.3.pcg.1509 (4/11)
- CBSS-393121.3.pcg.1913 (1/2)
- CBSS-393121.3.pcg.2760 (2/9)
- CBSS-393130.3.pcg.129 (2/5)
- CBSS-393130.3.pcg.794 (1/3)
- CBSS-393133.3.pcg.2787 (1/2)
- CBSS-49338.1.pcg.459 (1/8)
- CBSS-56780.10.pcg.1536 (1/5)
- CBSS-69014.3.pcg.2094 (1/13)
- CBSS-83332.1.pcg.3803 (1/10)
- CBSS-83333.1.pcg.946 (1/5)
- CBSS-84588.1.pcg.1247 (2/7)
- CBSS-87226.3.pcg.3639 (2/4)
- Cell Division Cluster (1/5)
- Cell division-ribosomal stress proteins cluster (2/13)
- Cluster YH and putative sugar transporter (4/9)
- Cluster-based Subsystem Grouping Hypothesis- perfractus Proteome Related (3/9)
- Conserved gene cluster associated with Met-tRNA formyltransferase (1/16)
- EC49-61 (1/5)
- KH domain RNA binding protein YHc (1/3)
- LMPTP YHc cluster (1/3)
- Spore Coat (2/20)

Cofactors, Vitamins, Prosthetic Groups, Pigments

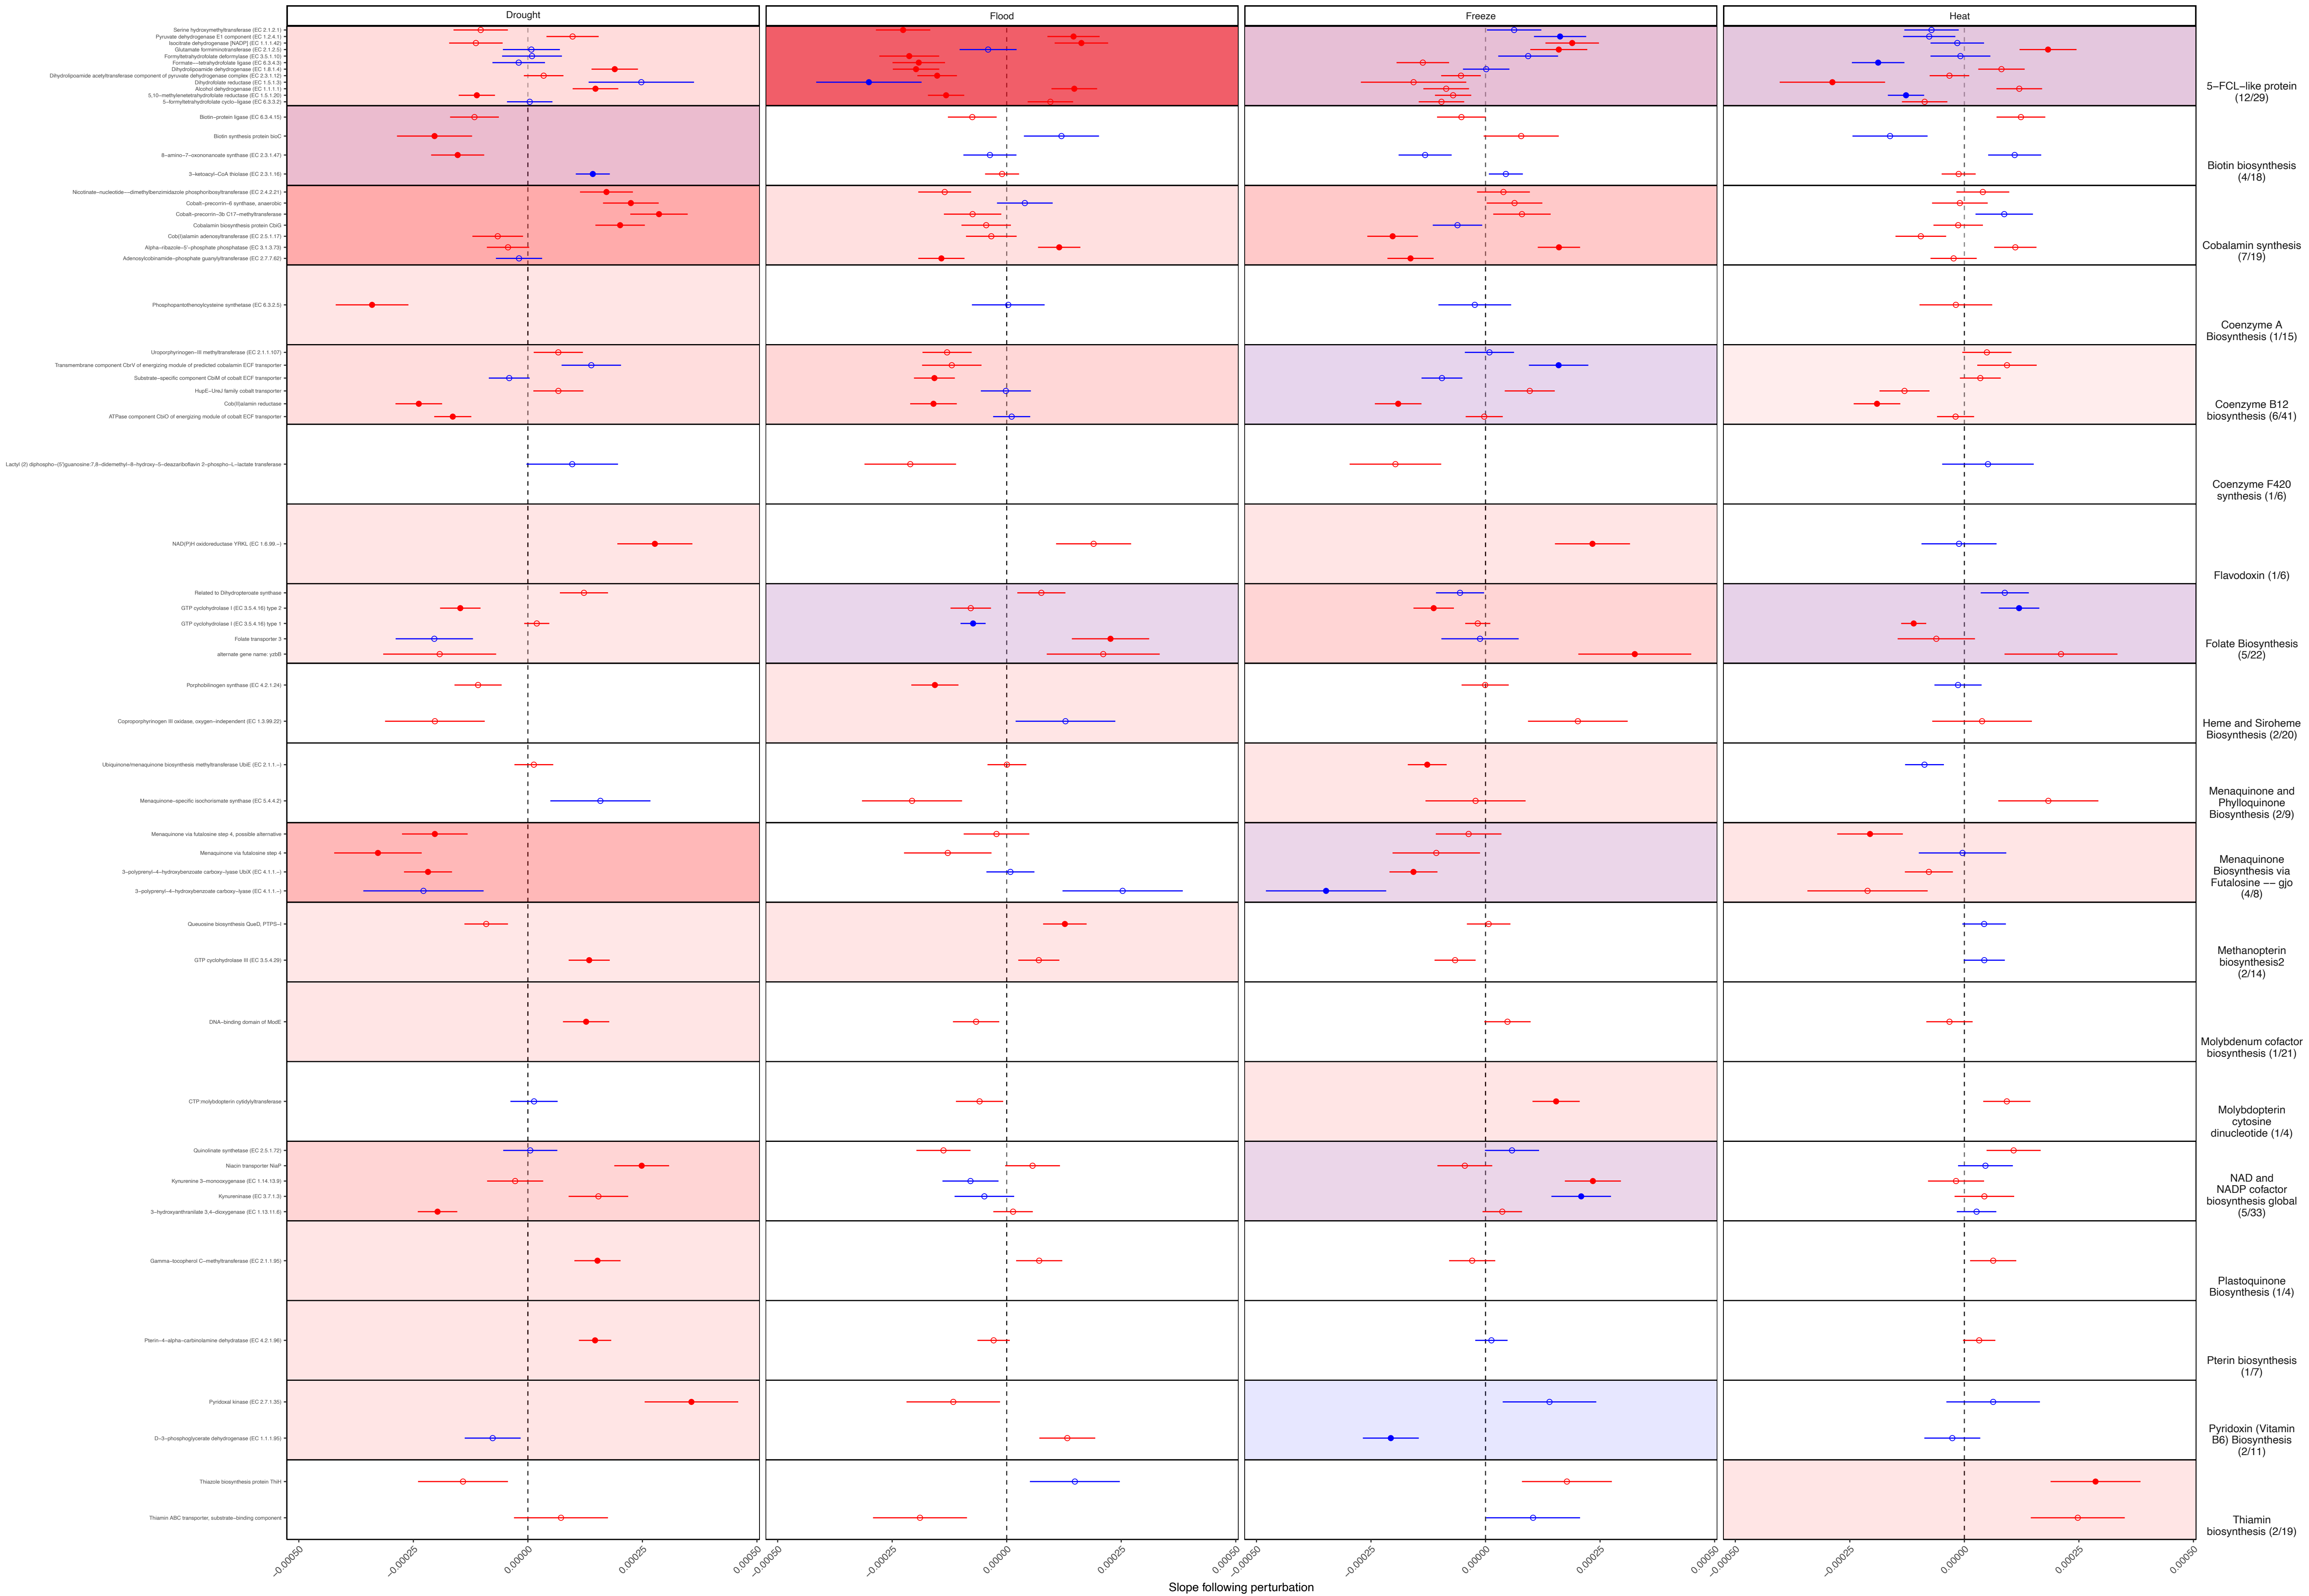

# DNA Metabolism

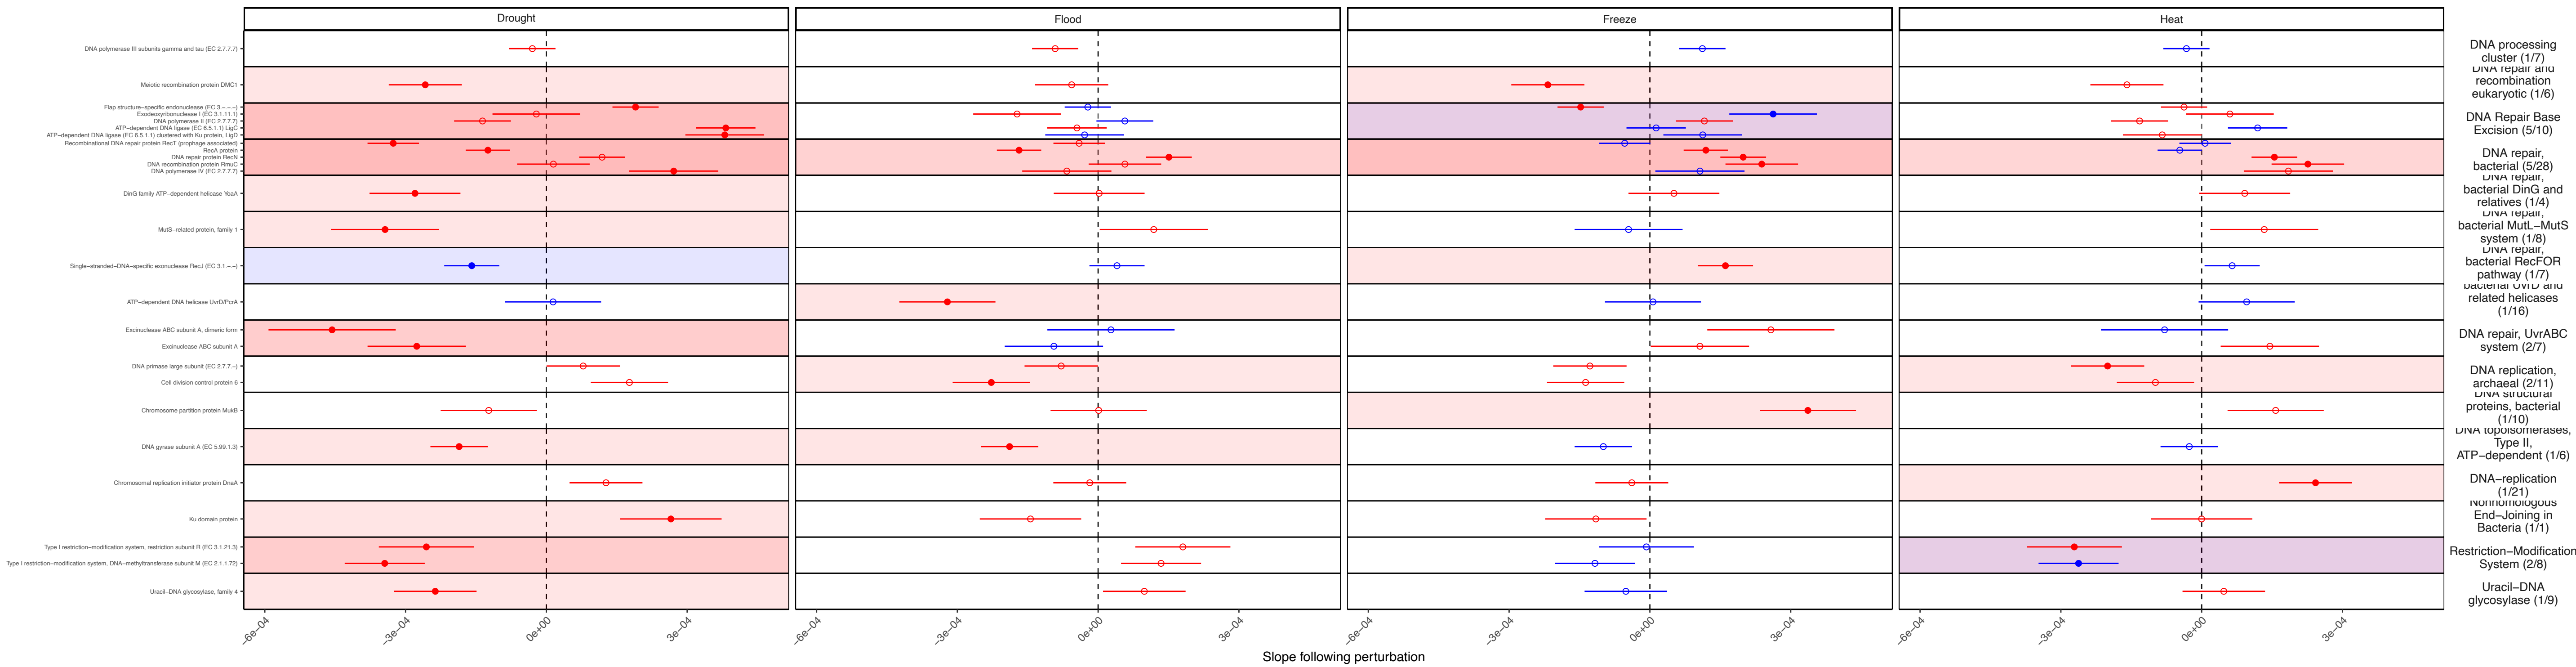

DNA processing cluster (1/7)  
 DNA repair and recombination eukaryotic (1/6)

DNA Repair Base Excision (5/10)

DNA repair, bacterial (5/28)  
 DNA repair, bacterial DinG and relatives (1/4)  
 DNA repair, bacterial MutL-MutS system (1/8)  
 DNA repair, bacterial RecFOR pathway (1/7)  
 DNA repair, bacterial UvrD and related helicases (1/16)

DNA repair, UvrABC system (2/7)

DNA replication, archaeal (2/11)  
 DNA structural proteins, bacterial (1/10)

DNA topoisomerases, Type II, ATP-dependent (1/6)

DNA-replication (1/21)  
 nonhomologous End-Joining in Bacteria (1/1)

Restriction-Modification System (2/8)

Uracil-DNA glycosylase (1/9)

# Dormancy and Sporulation

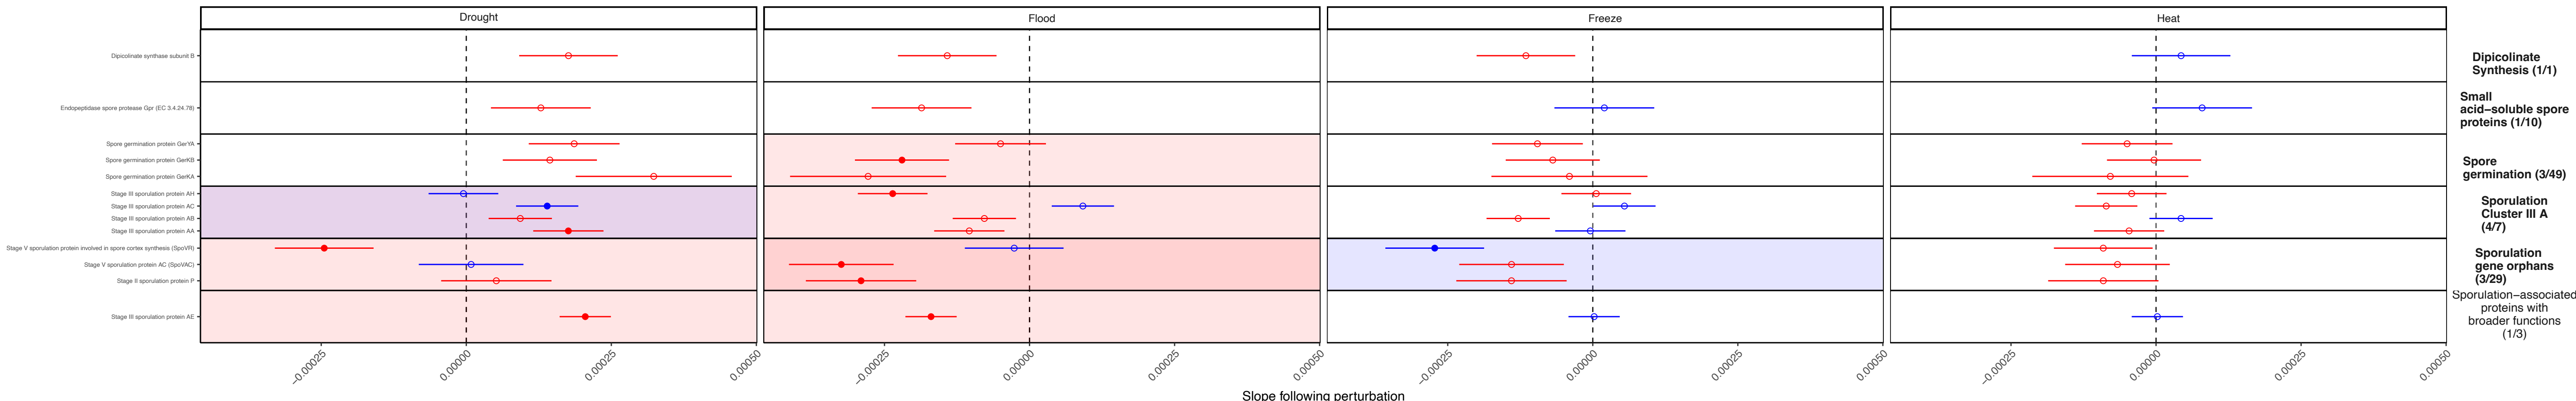



# Fatty Acids, Lipids, and Isoprenoids

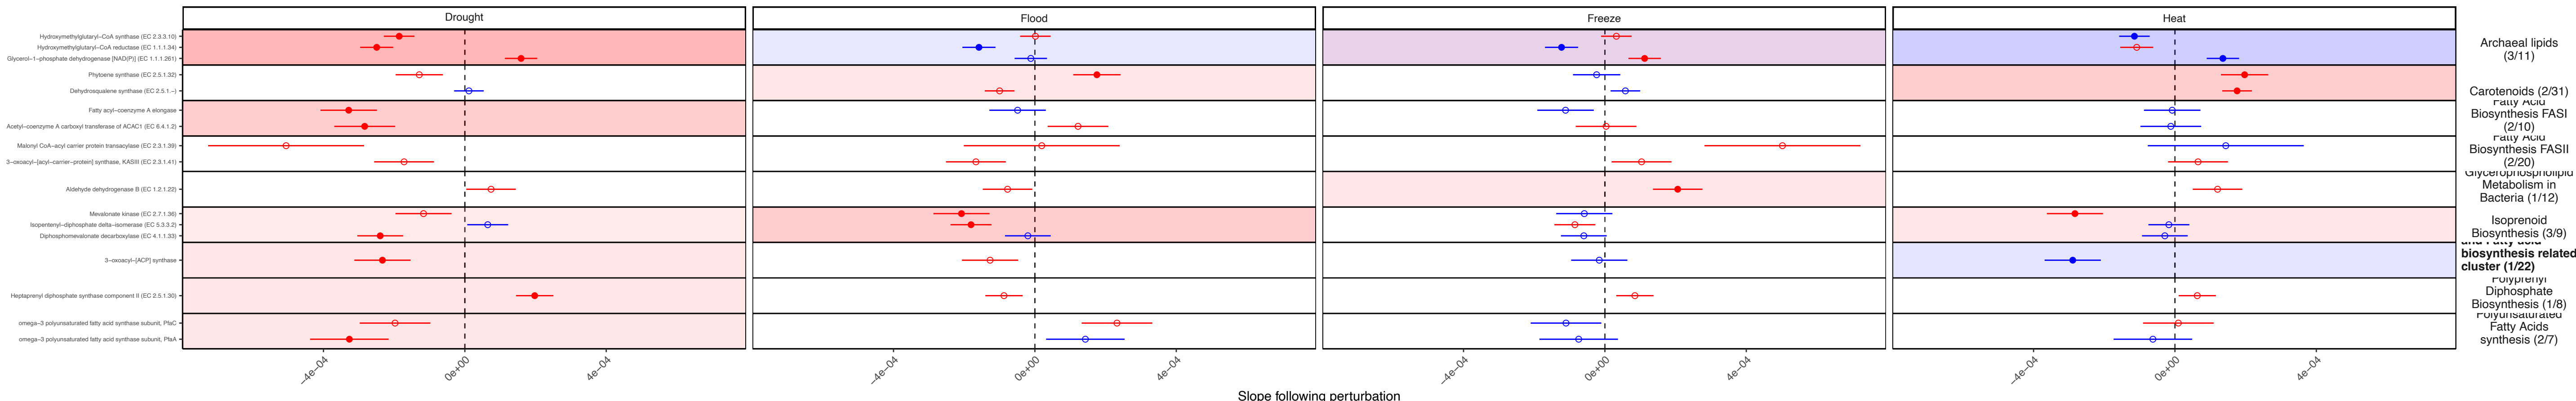

- Archaeal lipids (3/11)
- Carotenoids (2/31)
- Fatty Acid Biosynthesis FASI (2/10)
- Fatty Acid Biosynthesis FASII (2/20)
- Glycerophospholipid Metabolism in Bacteria (1/12)
- Isoprenoid Biosynthesis (3/9)
- and fatty acid biosynthesis related cluster (1/22)
- isoprenyl Diphosphate Biosynthesis (1/8)
- polyunsaturated Fatty Acids synthesis (2/7)

Slope following perturbation

# Iron acquisition and metabolism

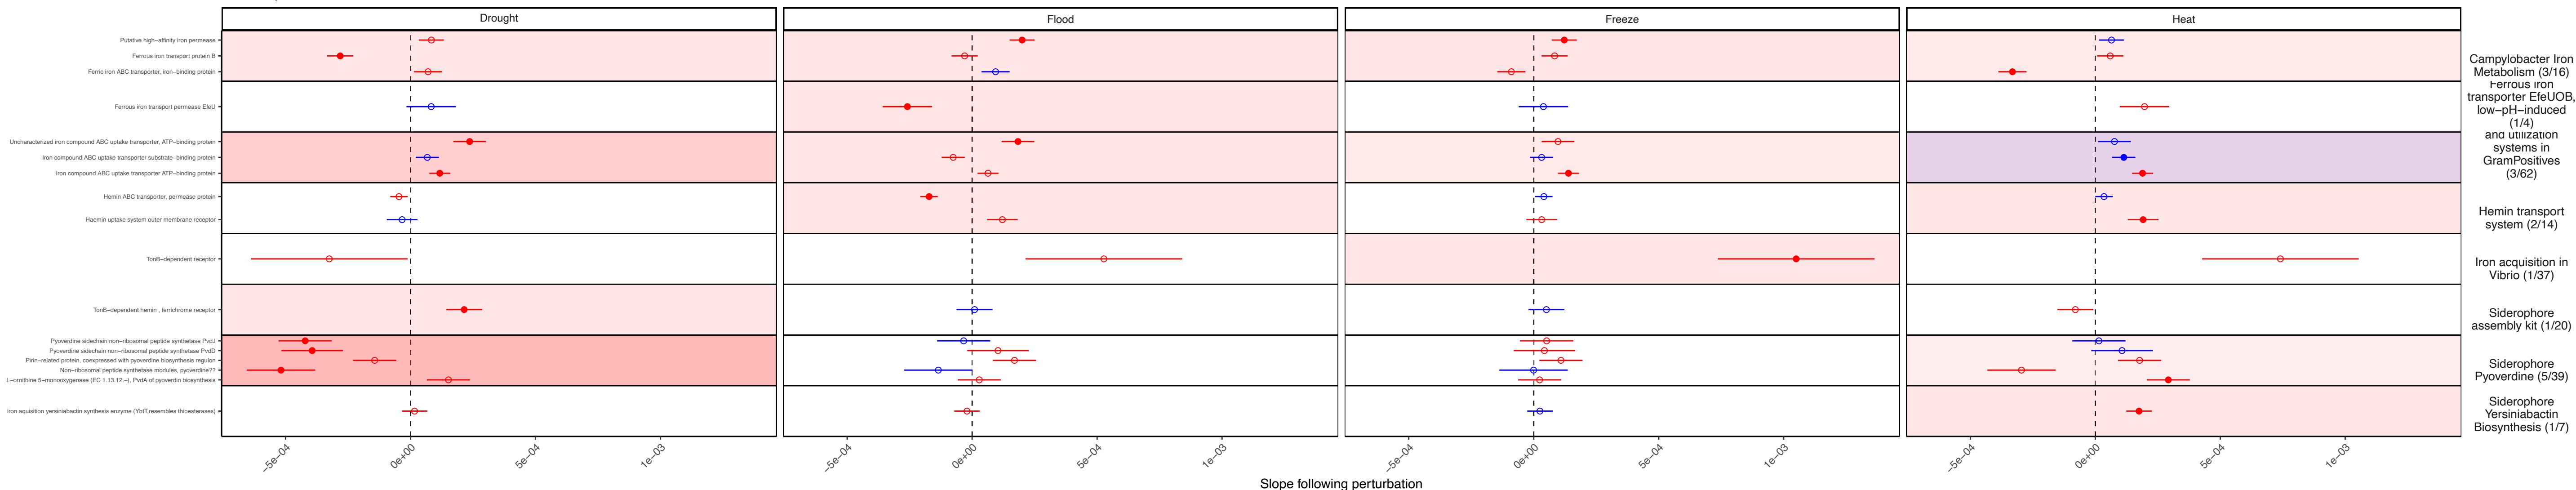

# Membrane Transport

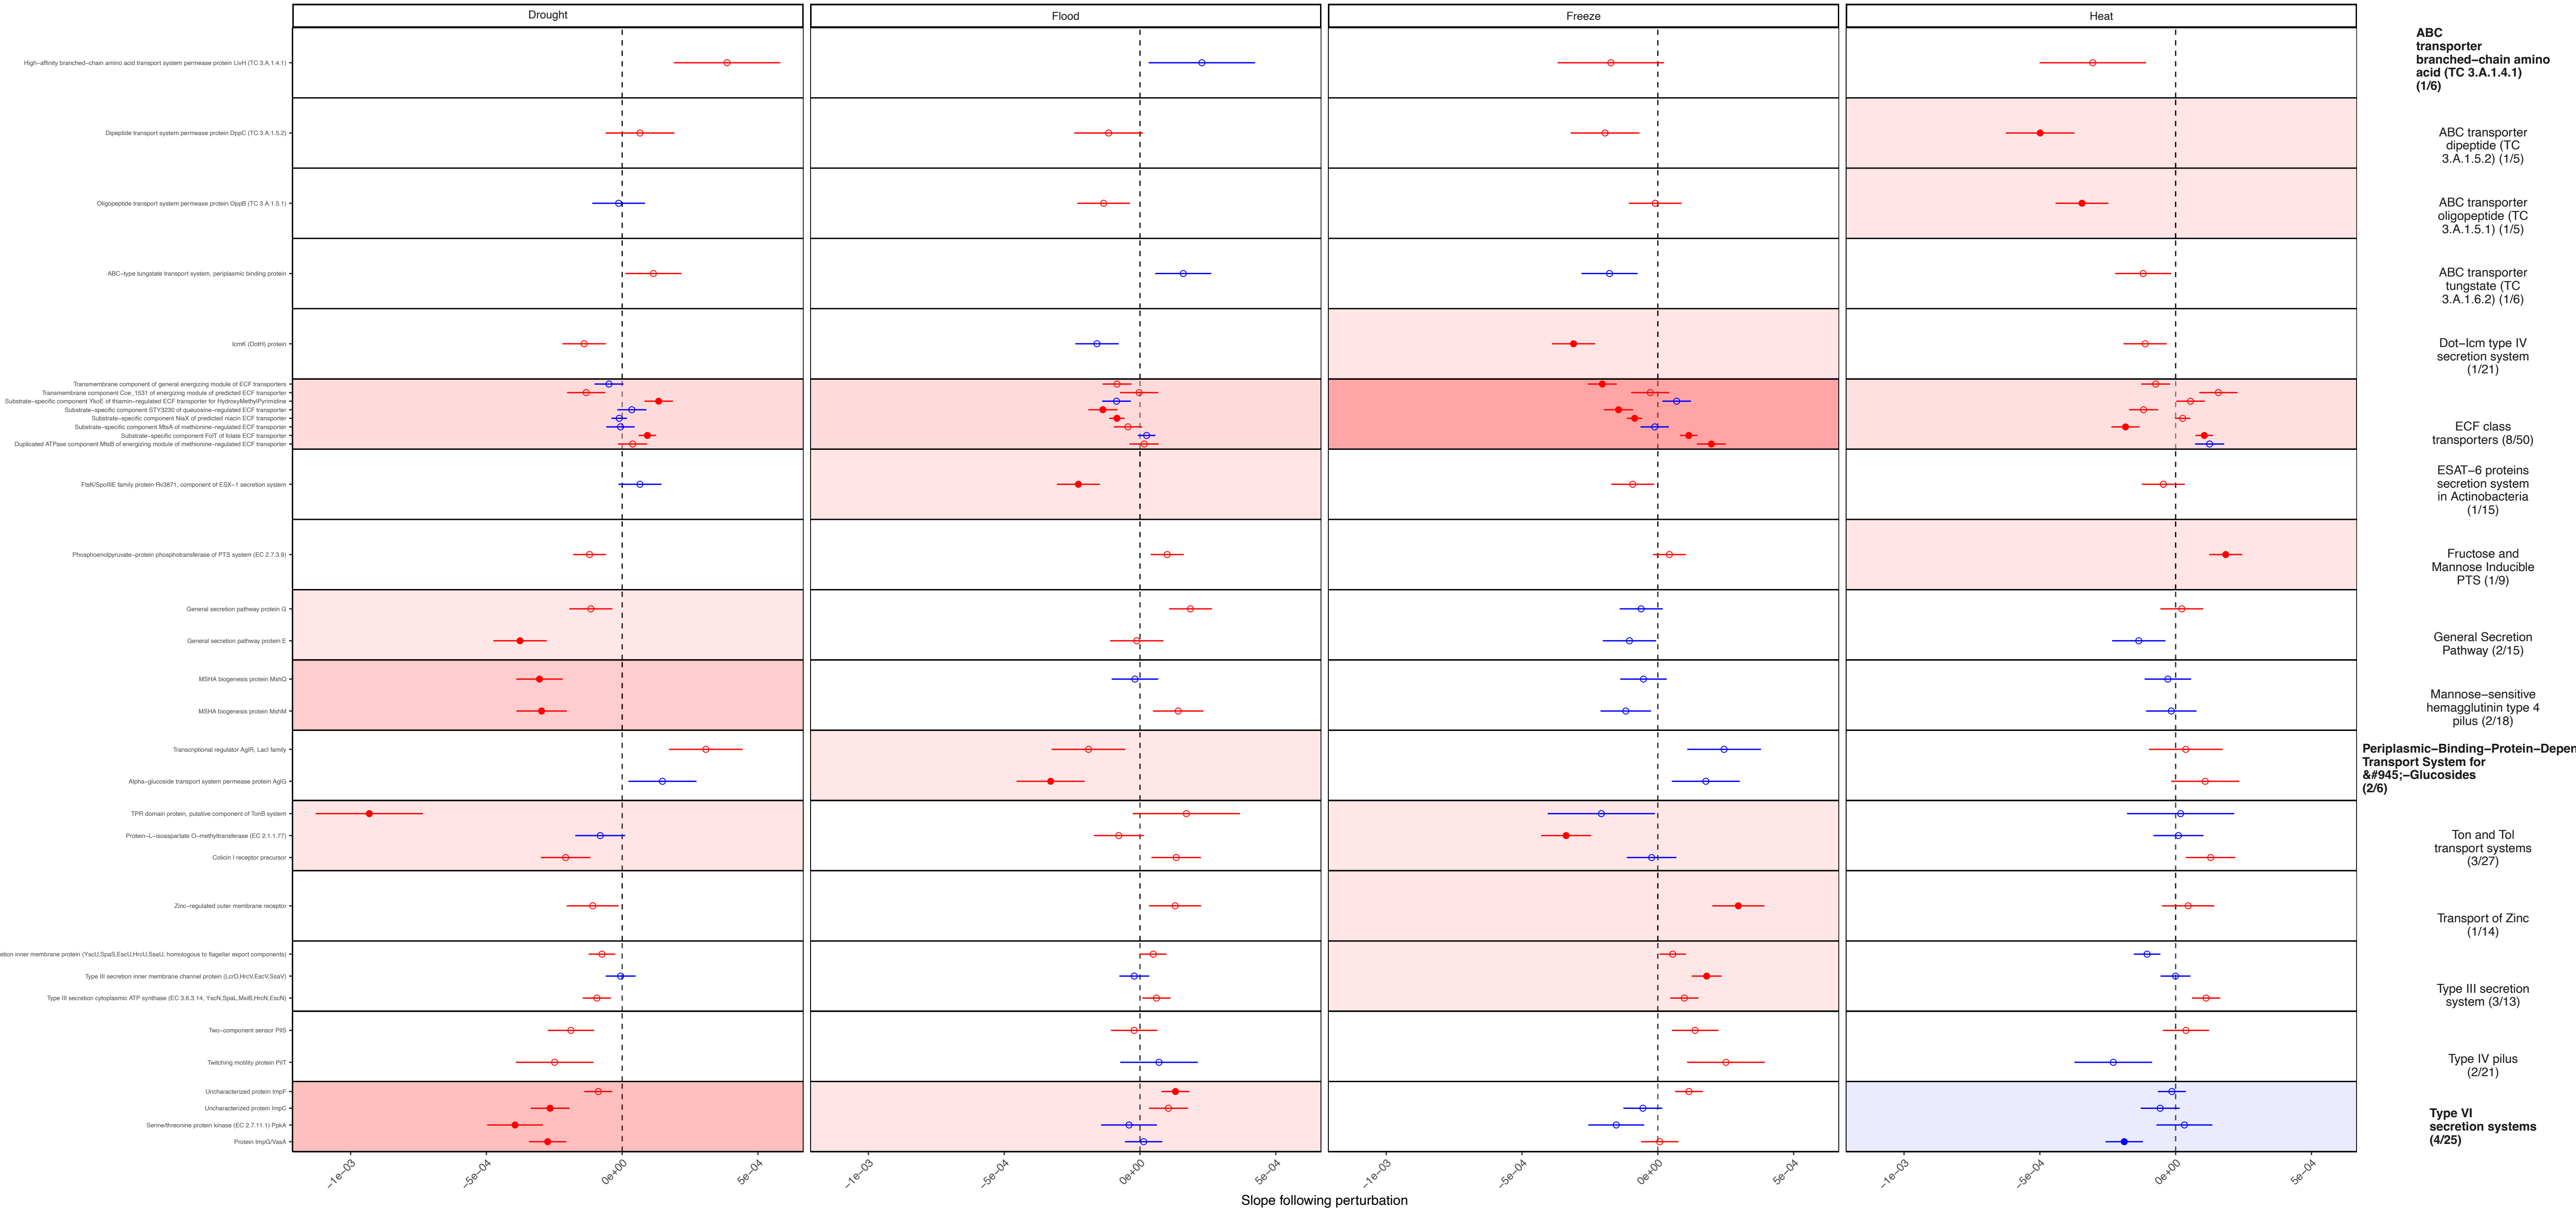

Slope following perturbation

# Metabolism of Aromatic Compounds

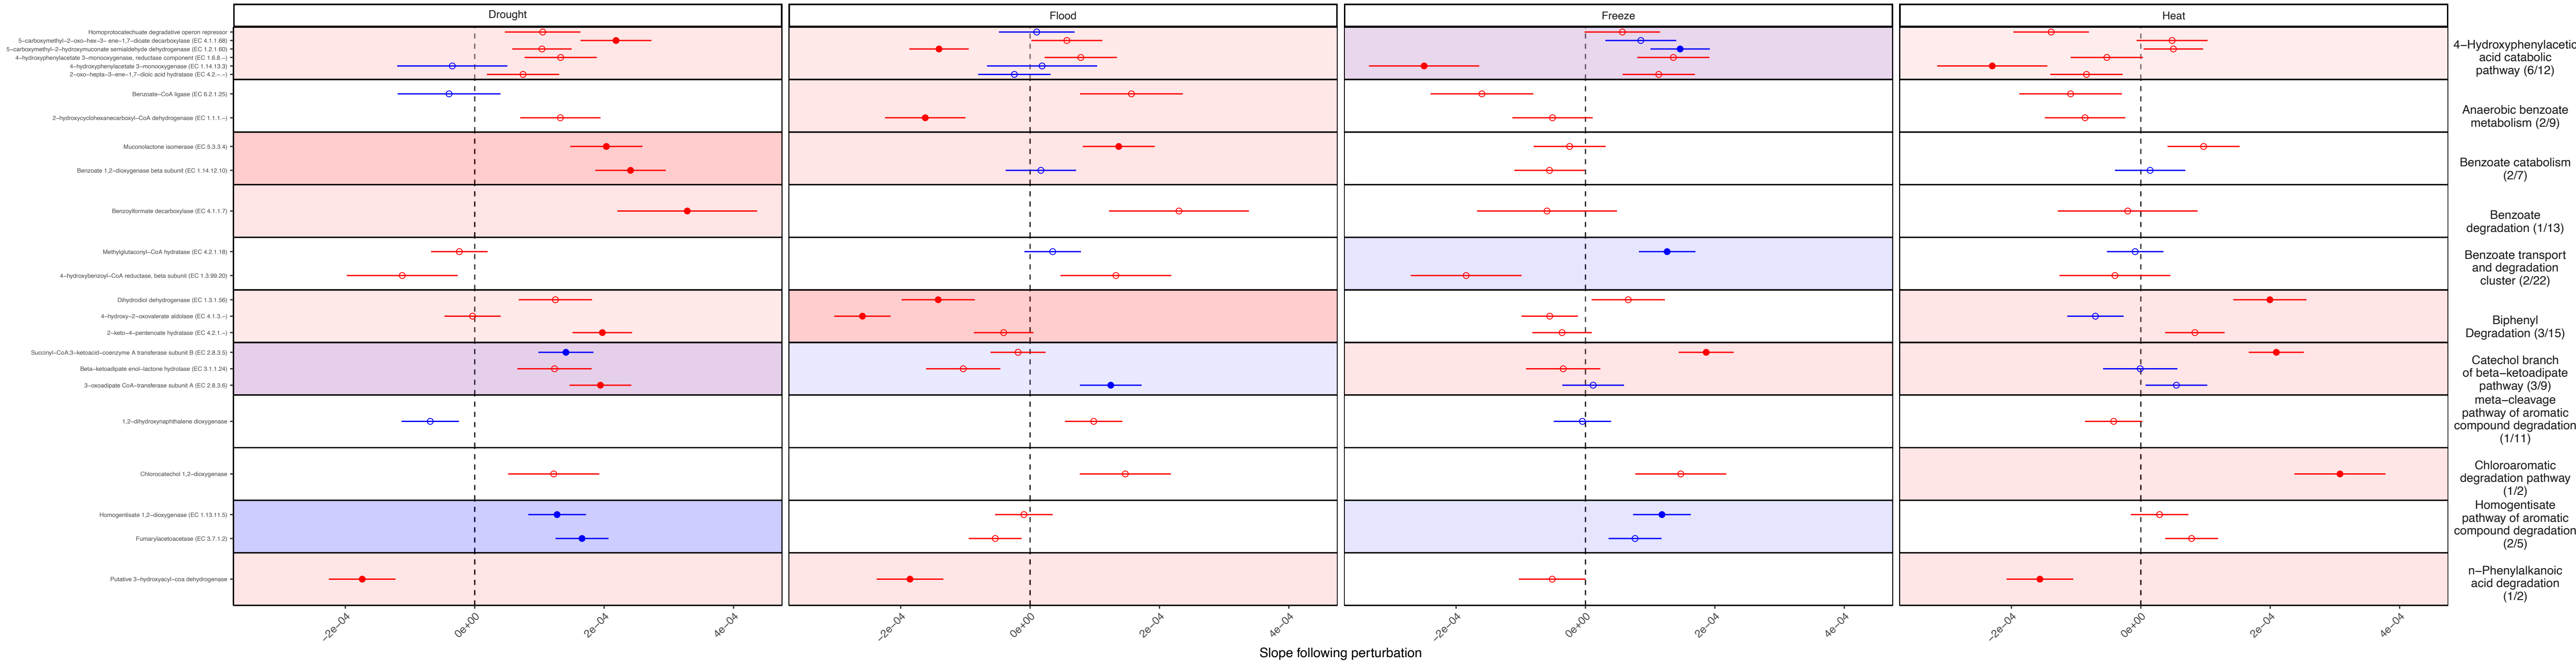

# Miscellaneous

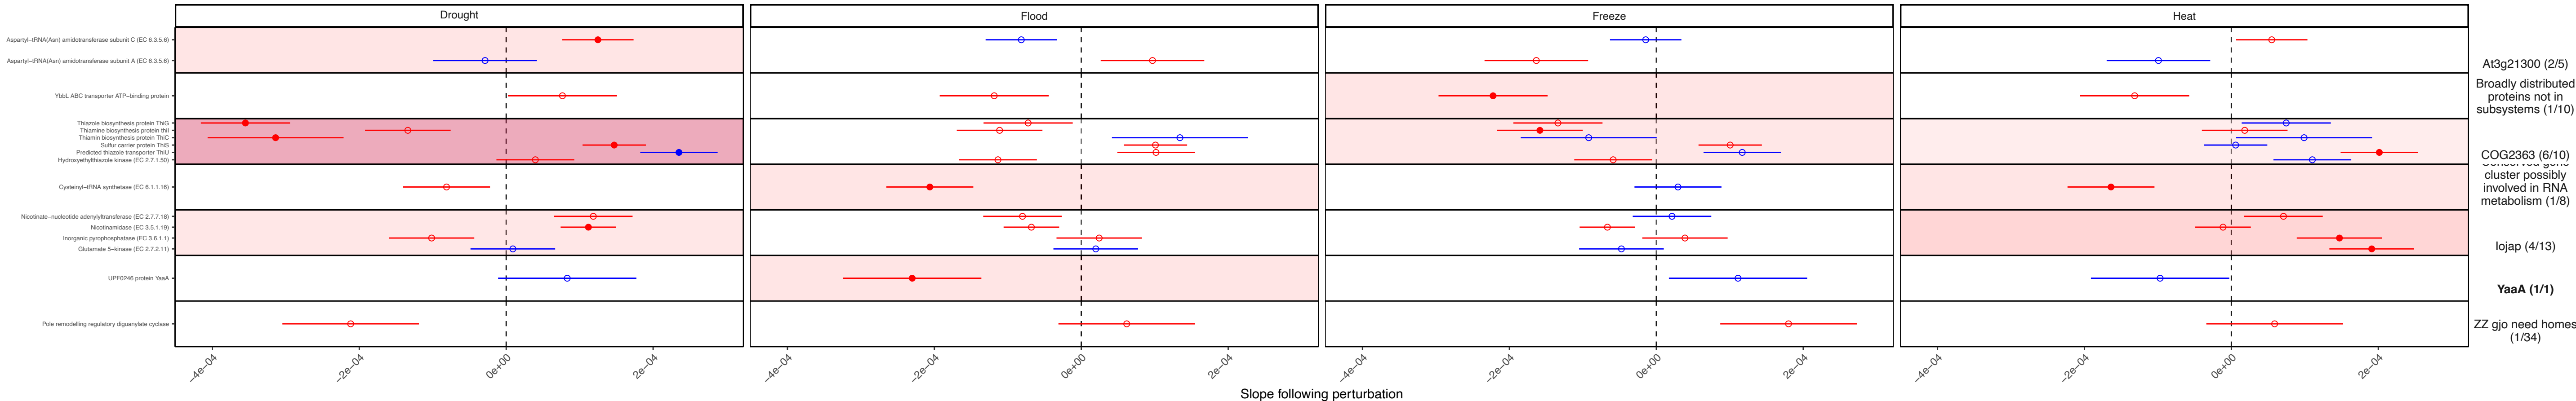

# Motility and Chemotaxis

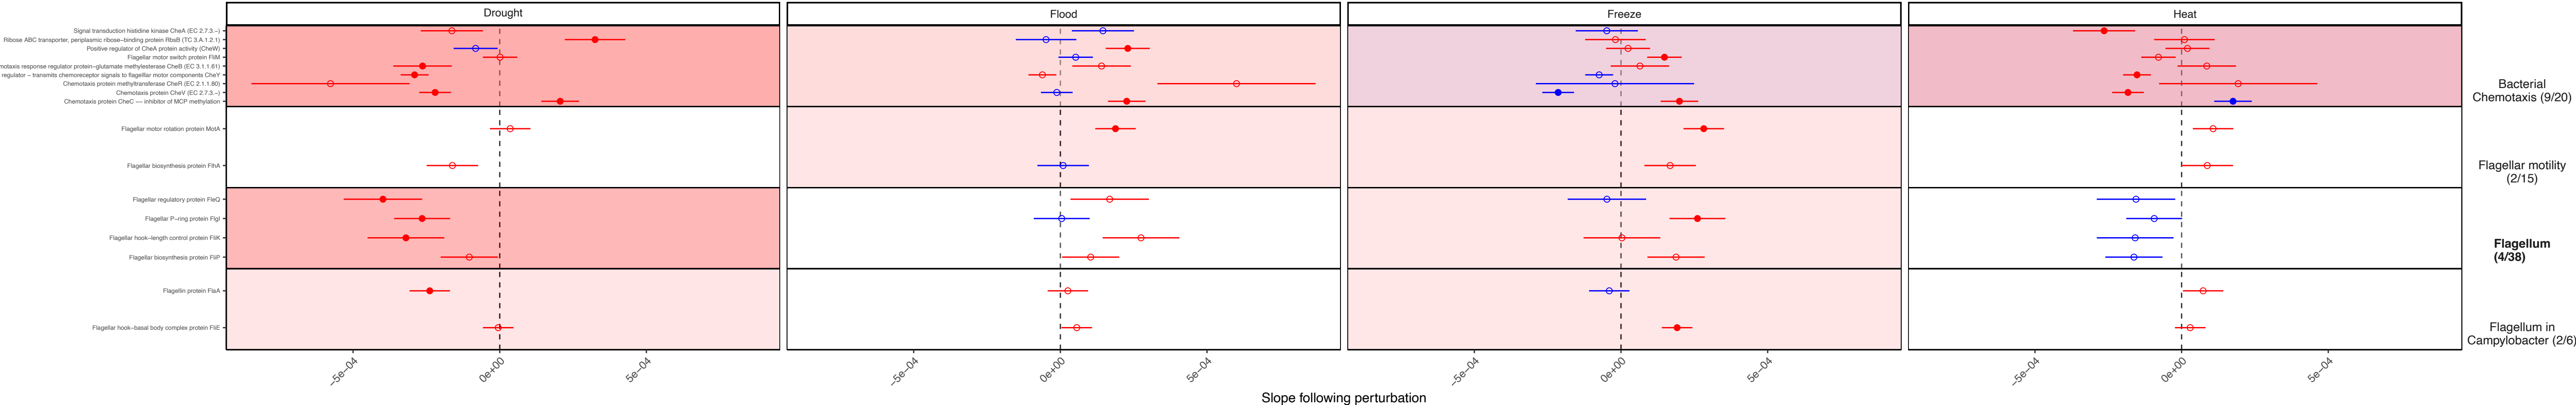

# Nitrogen Metabolism

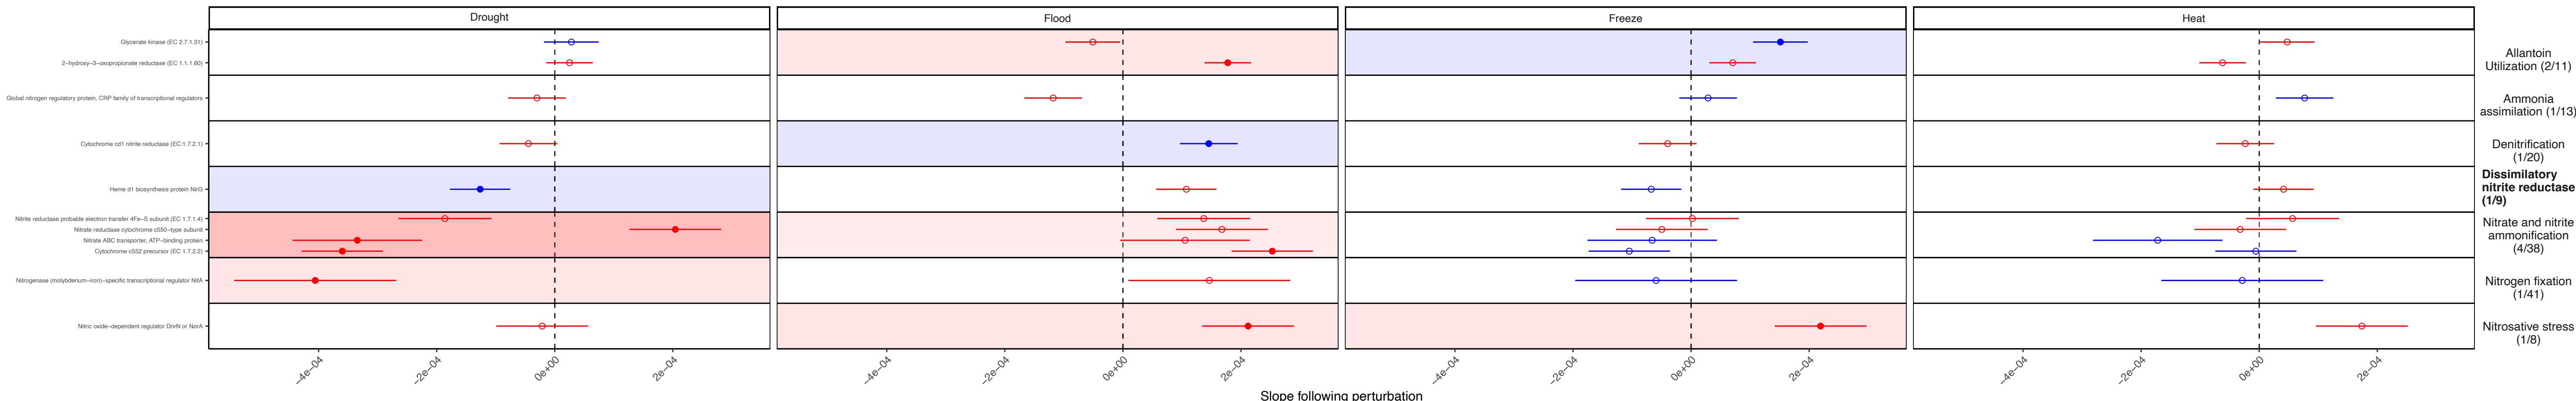

# Nucleosides and Nucleotides

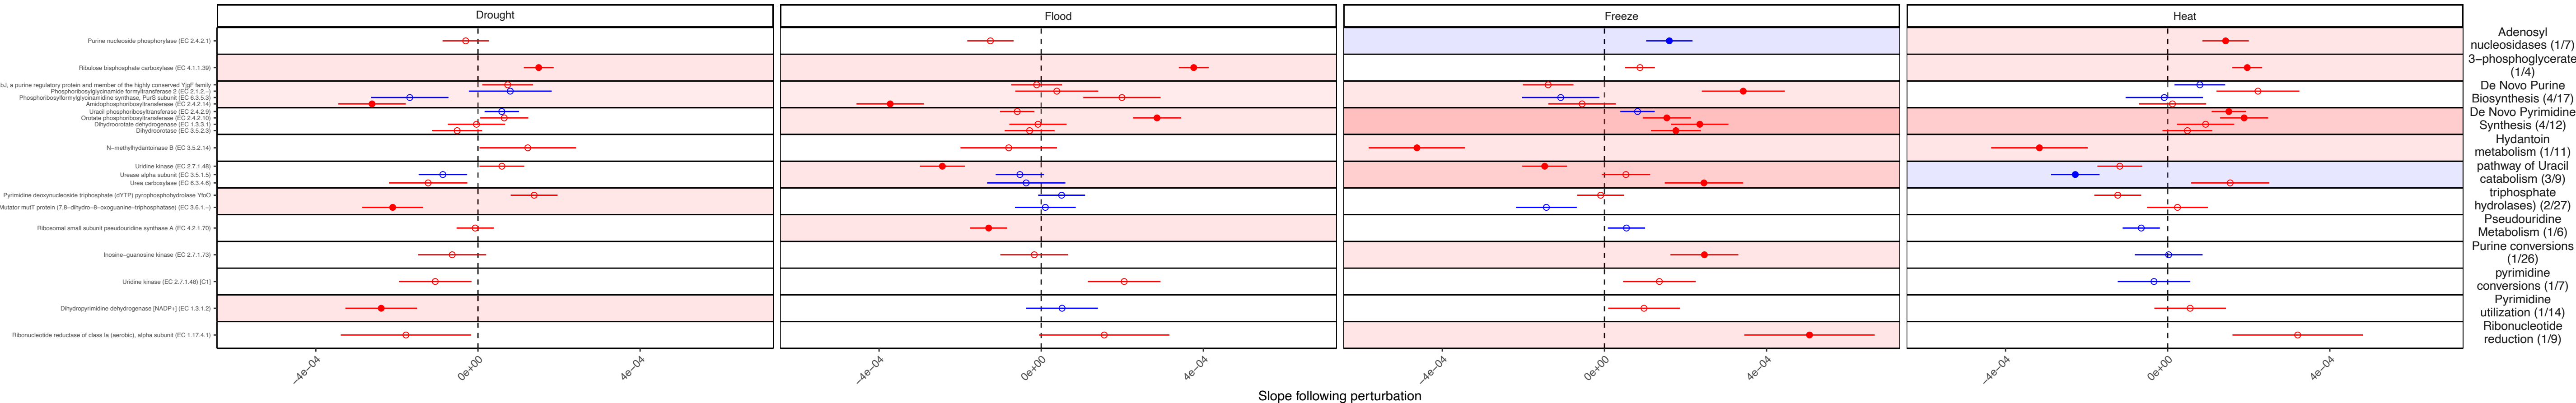



# Phages, Prophages, Transposable elements, Plasmids

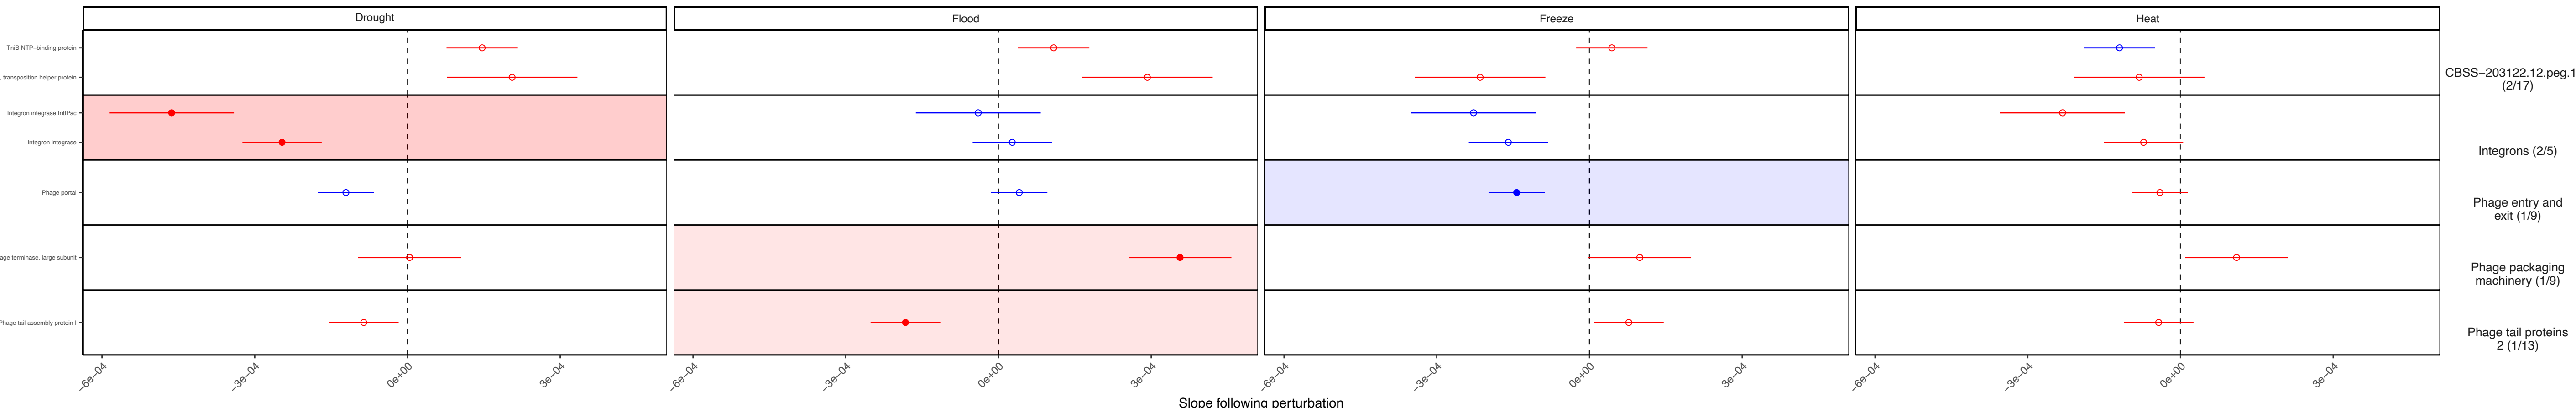

# Phosphorus Metabolism

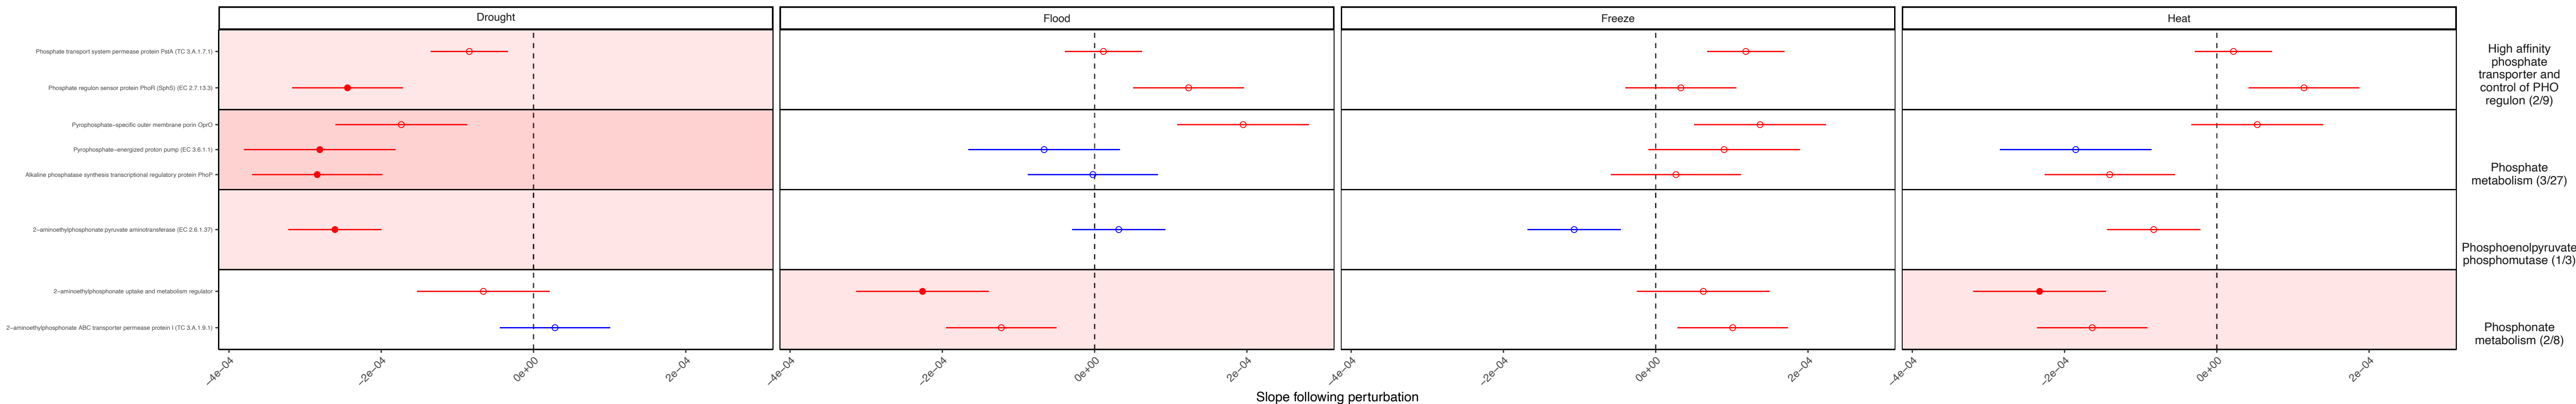

# Photosynthesis

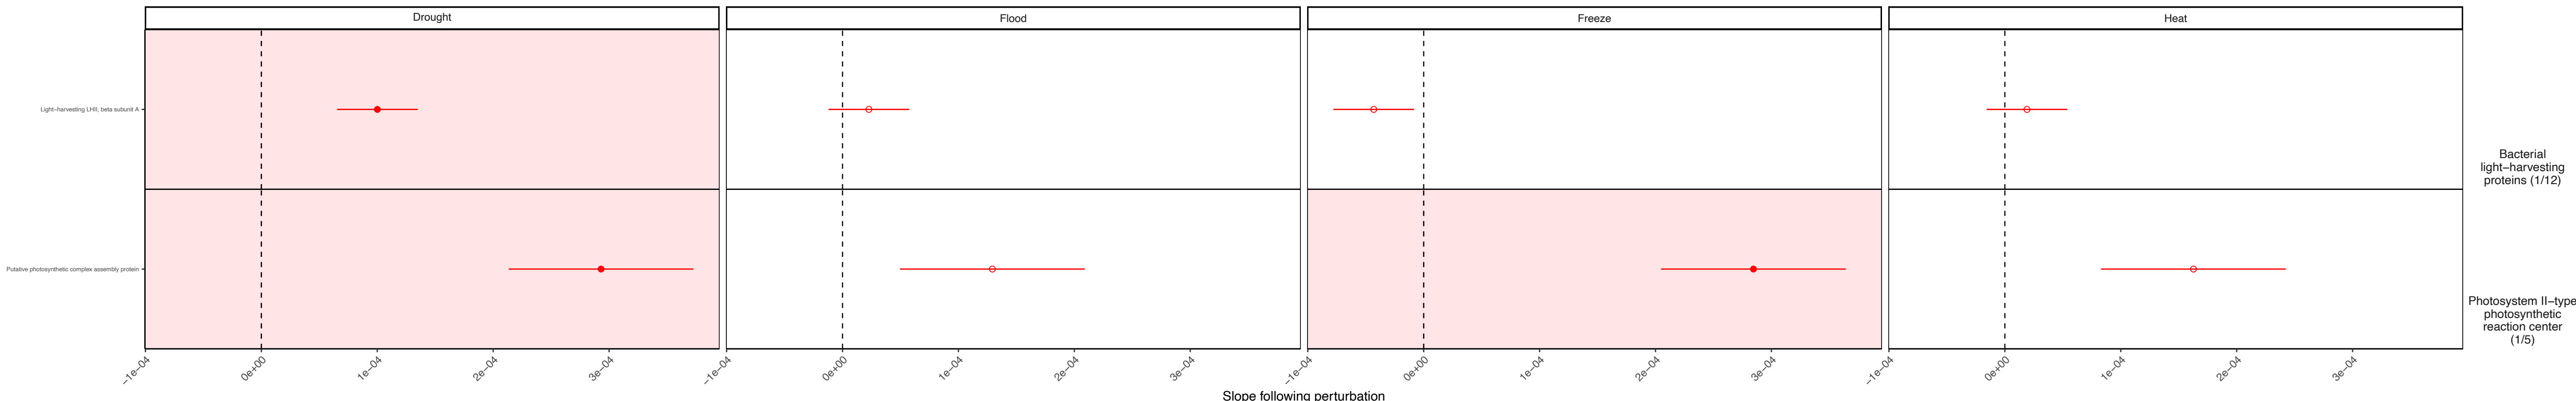

# Potassium metabolism

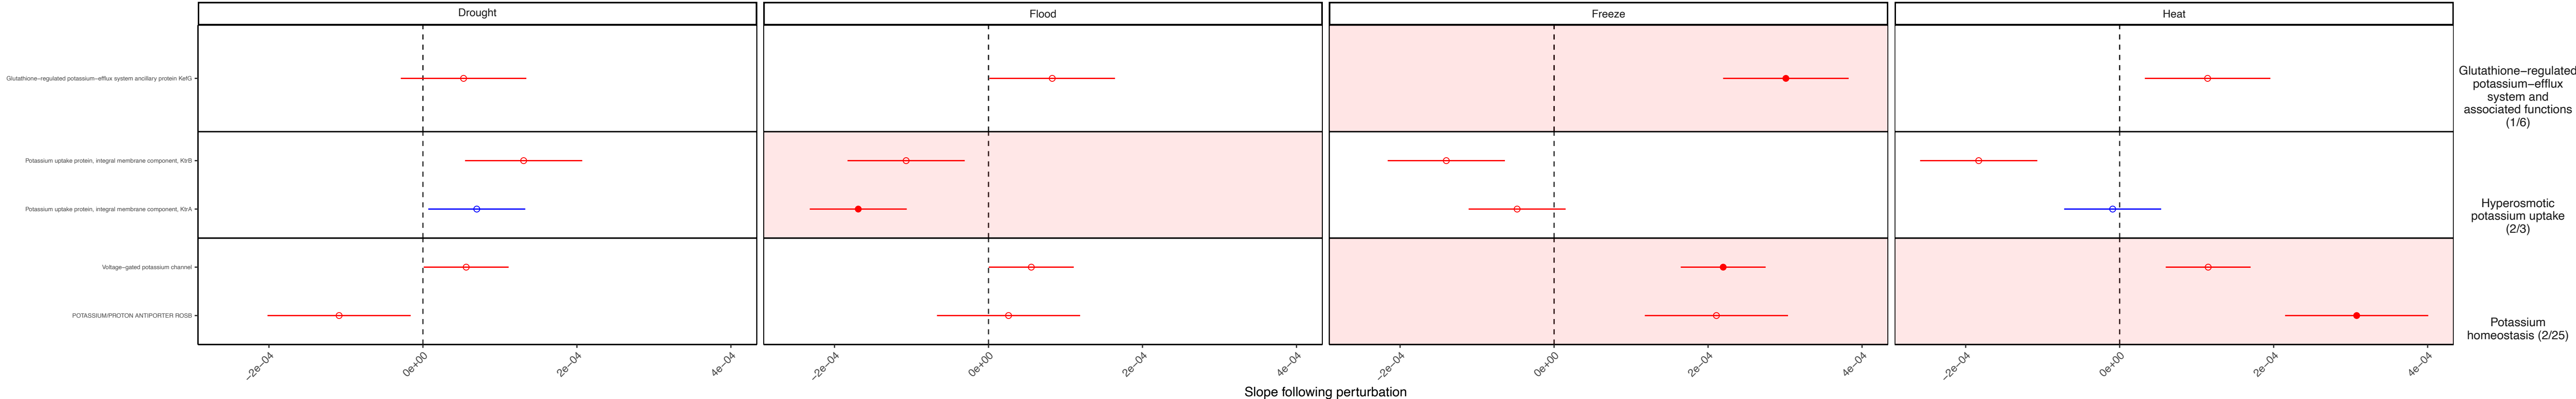

# Protein Metabolism

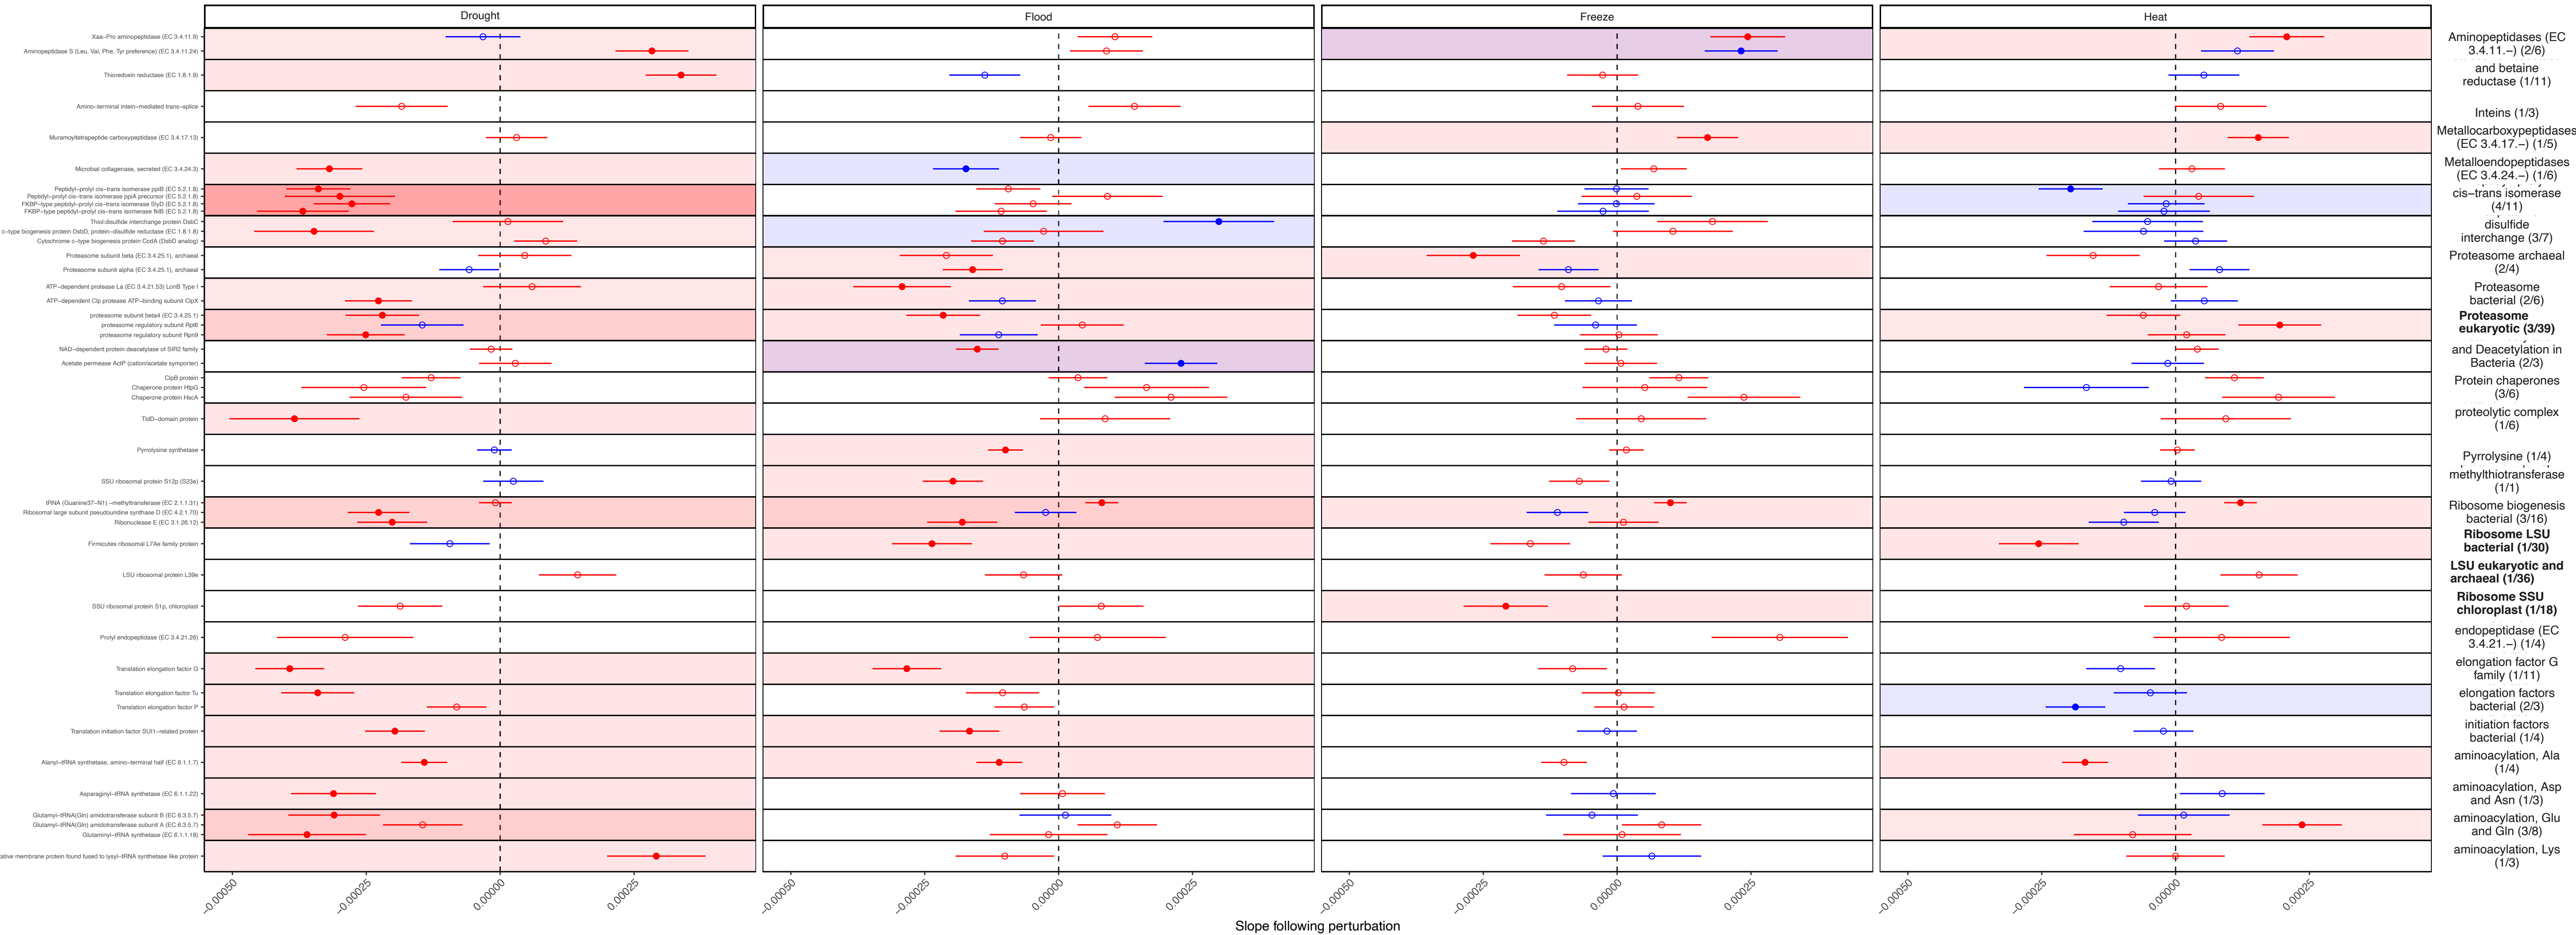

# Regulation and Cell signaling

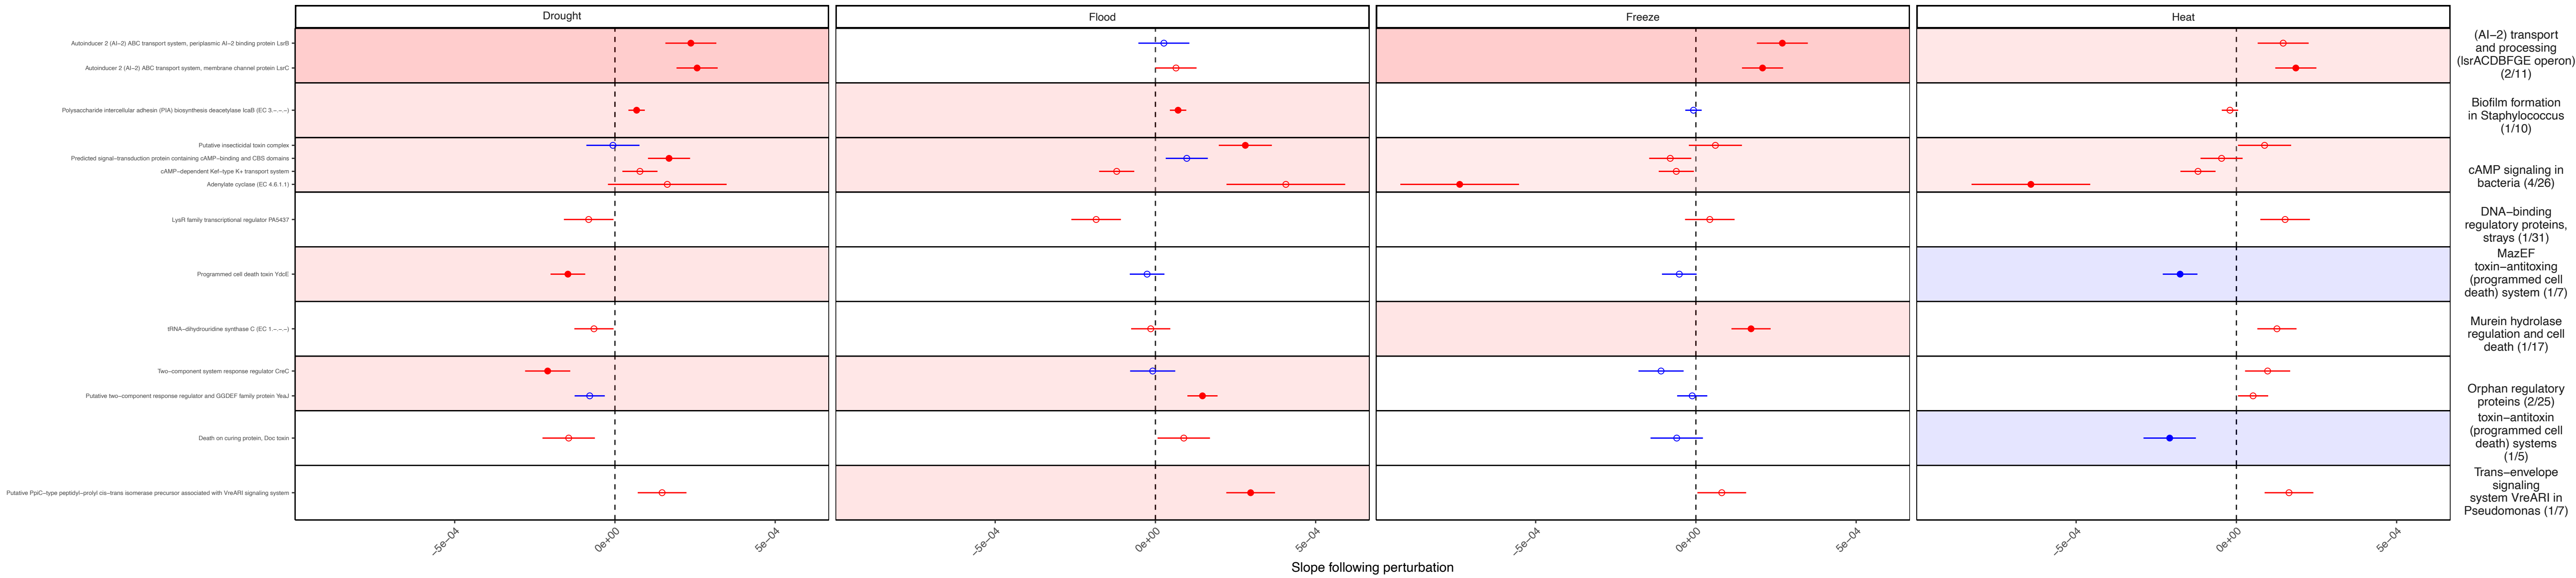

# Respiration

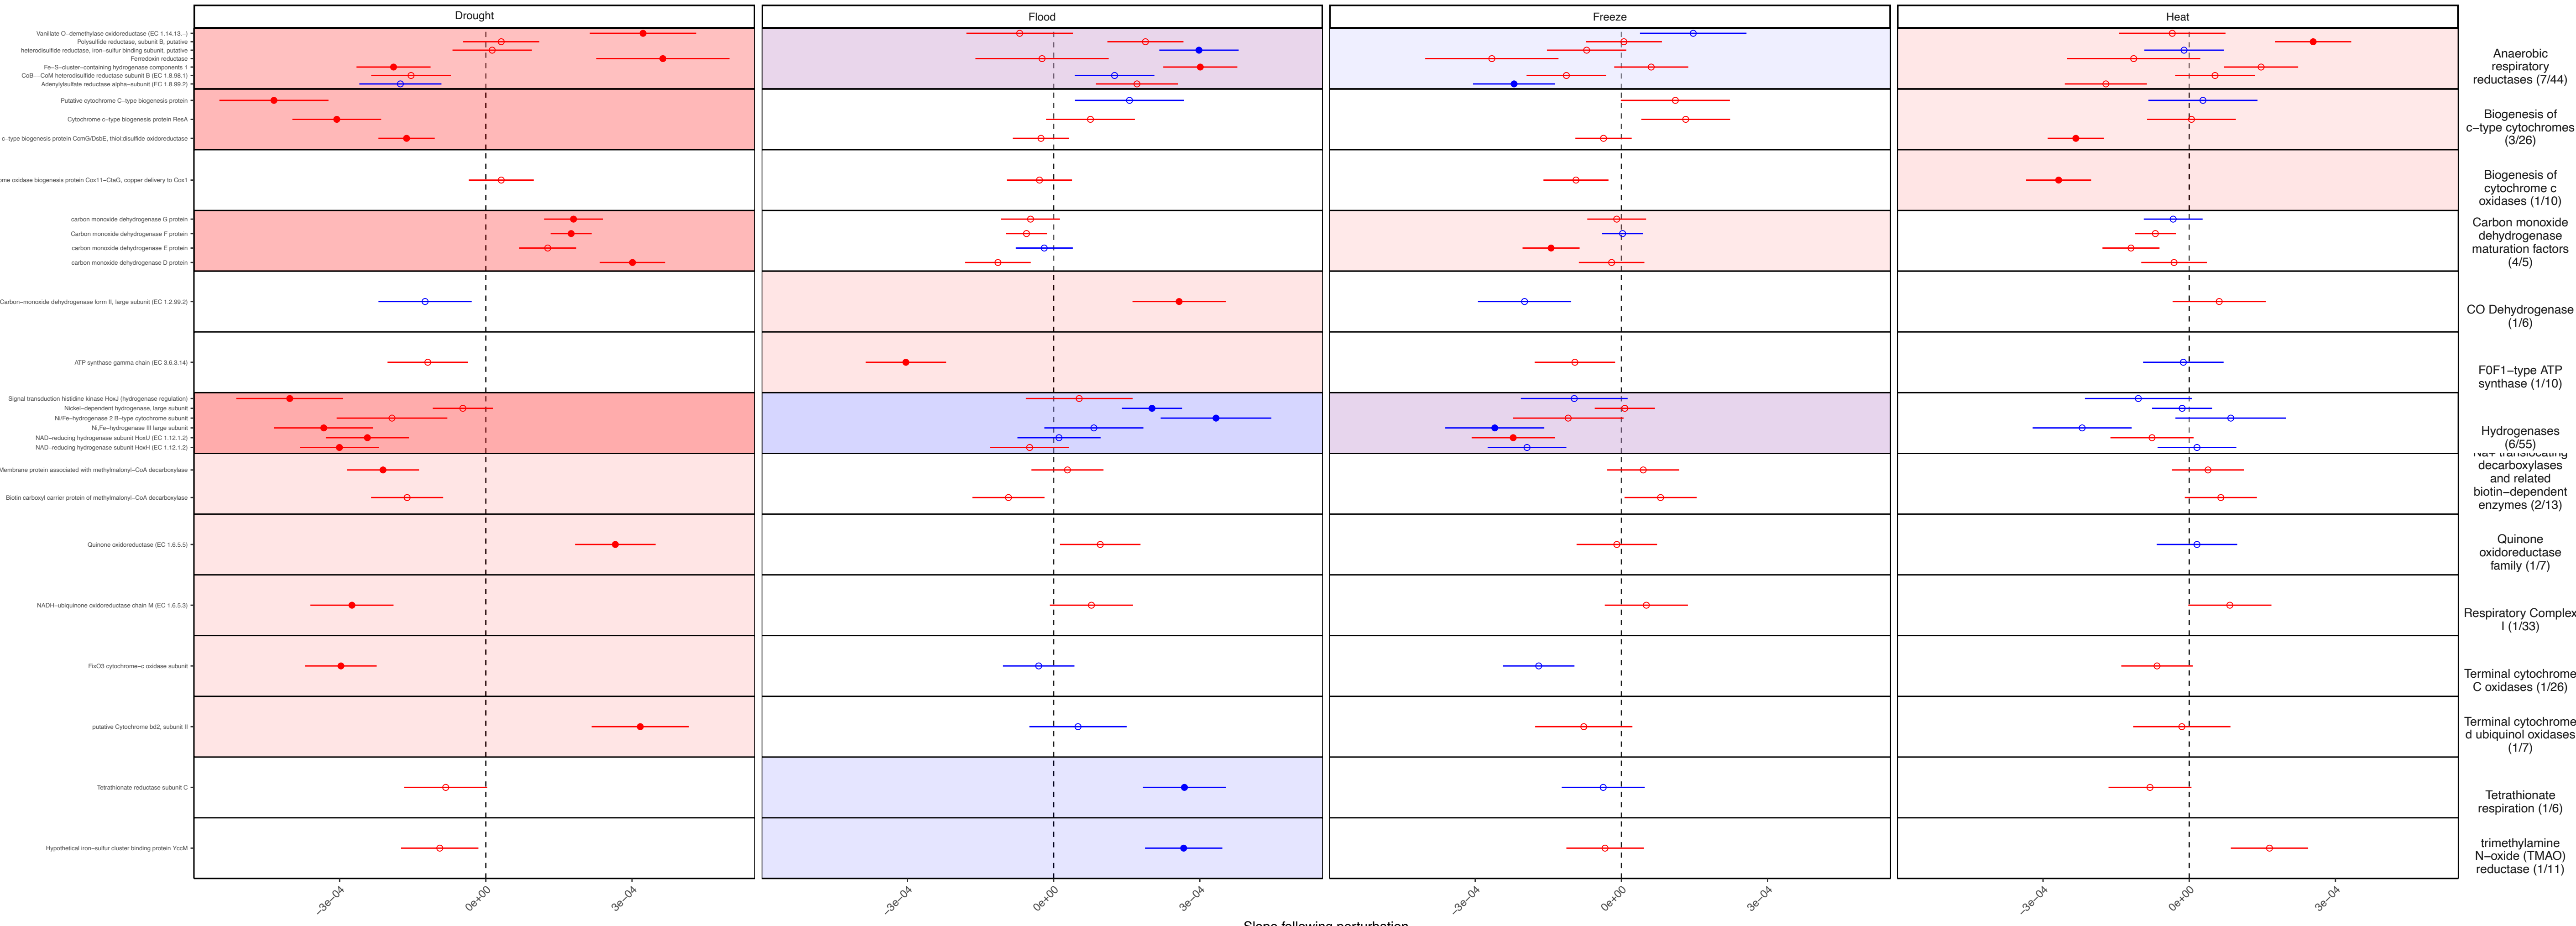

Slope following perturbation

# RNA Metabolism

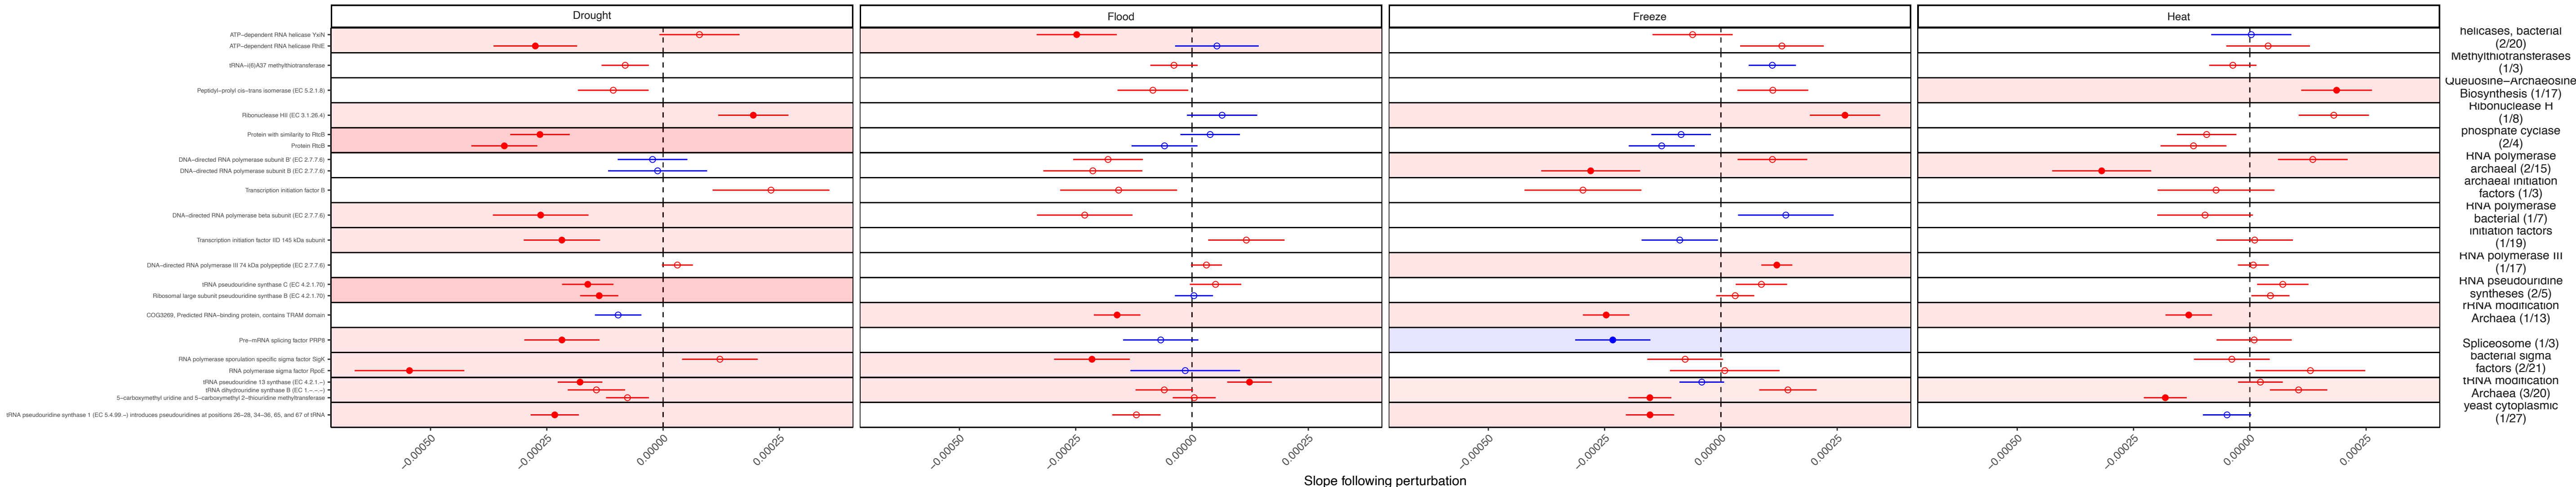



# Secondary Metabolism

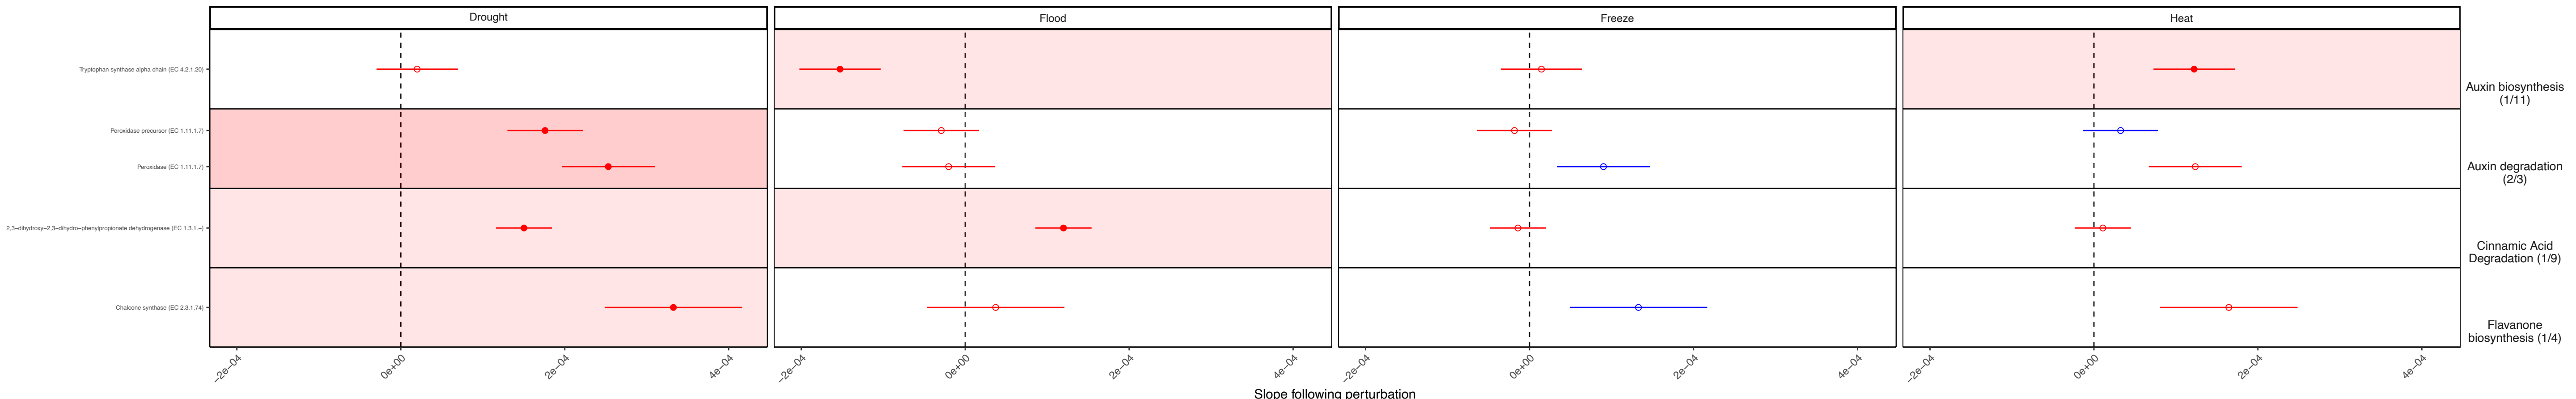

# Stress Response

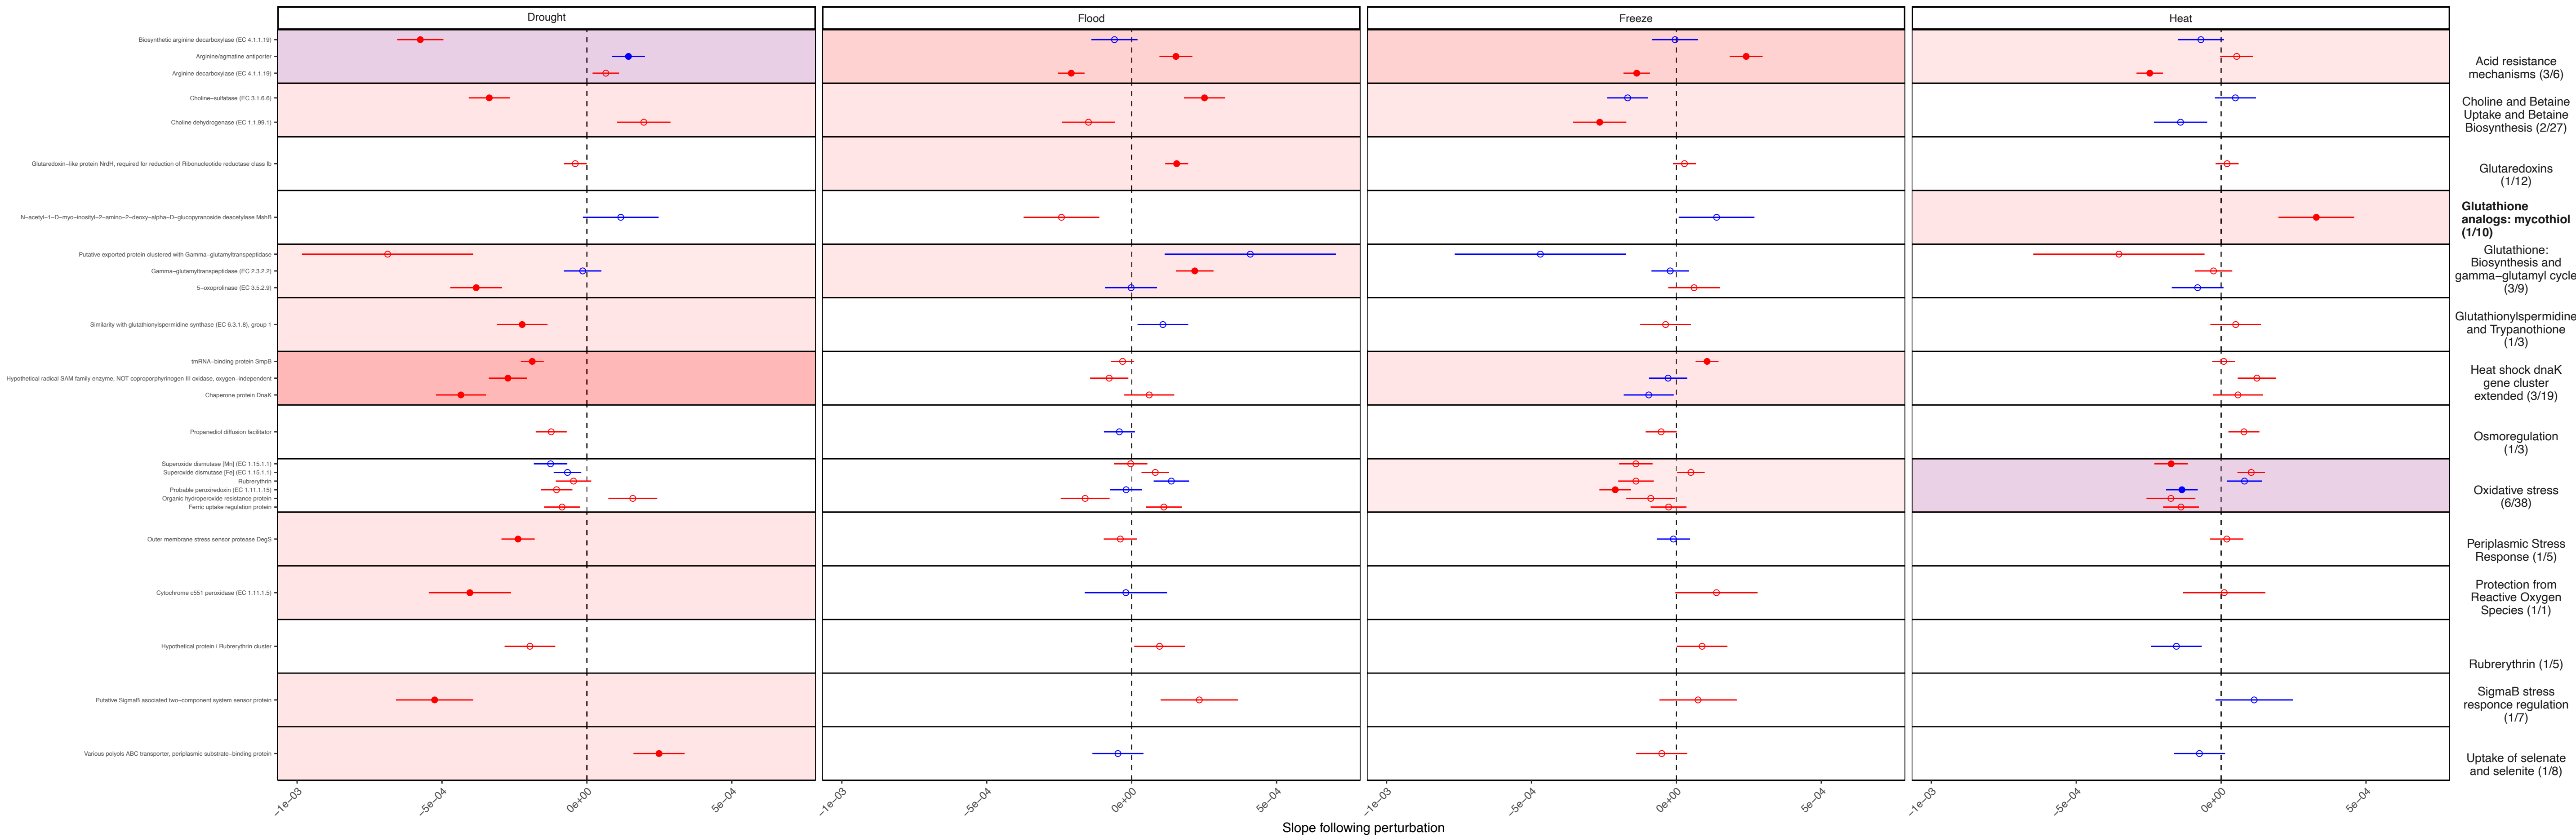

# Sulfur Metabolism

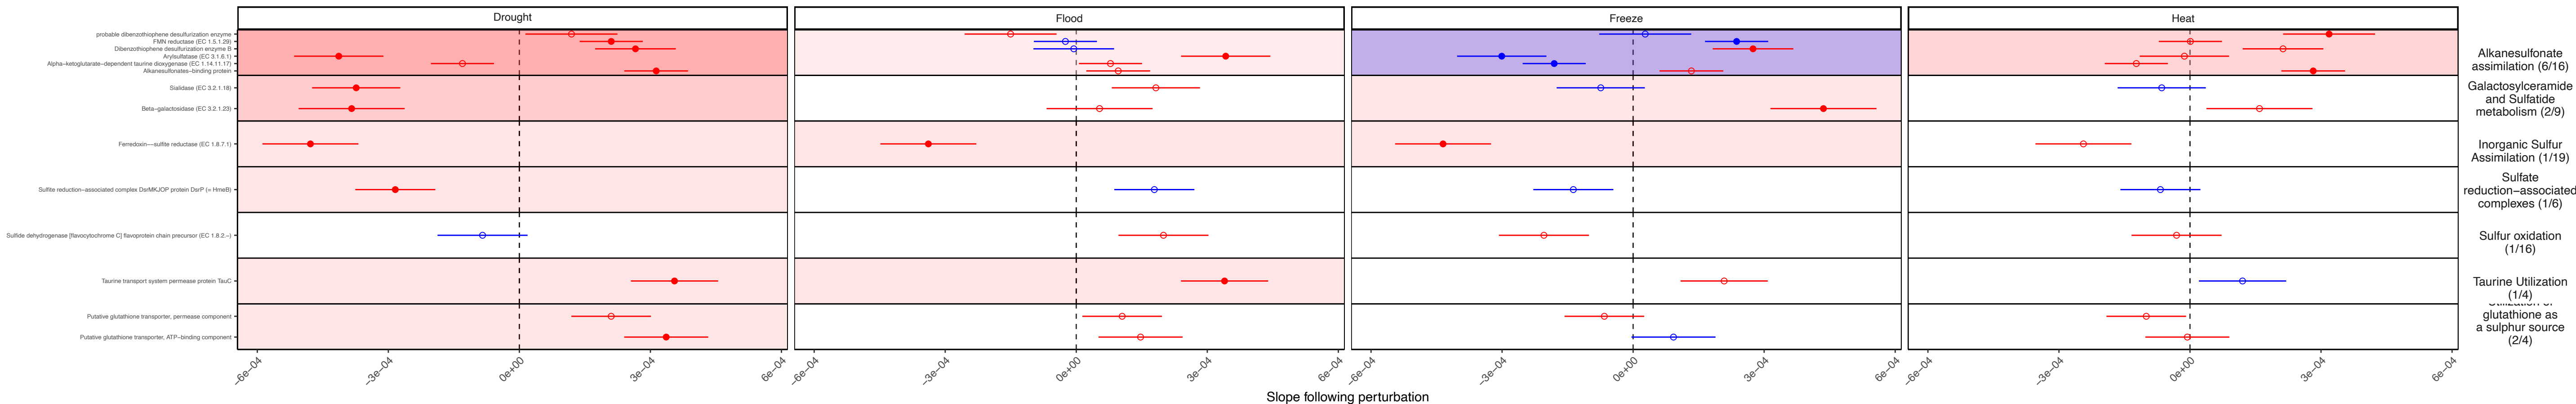

# Virulence, Disease and Defense

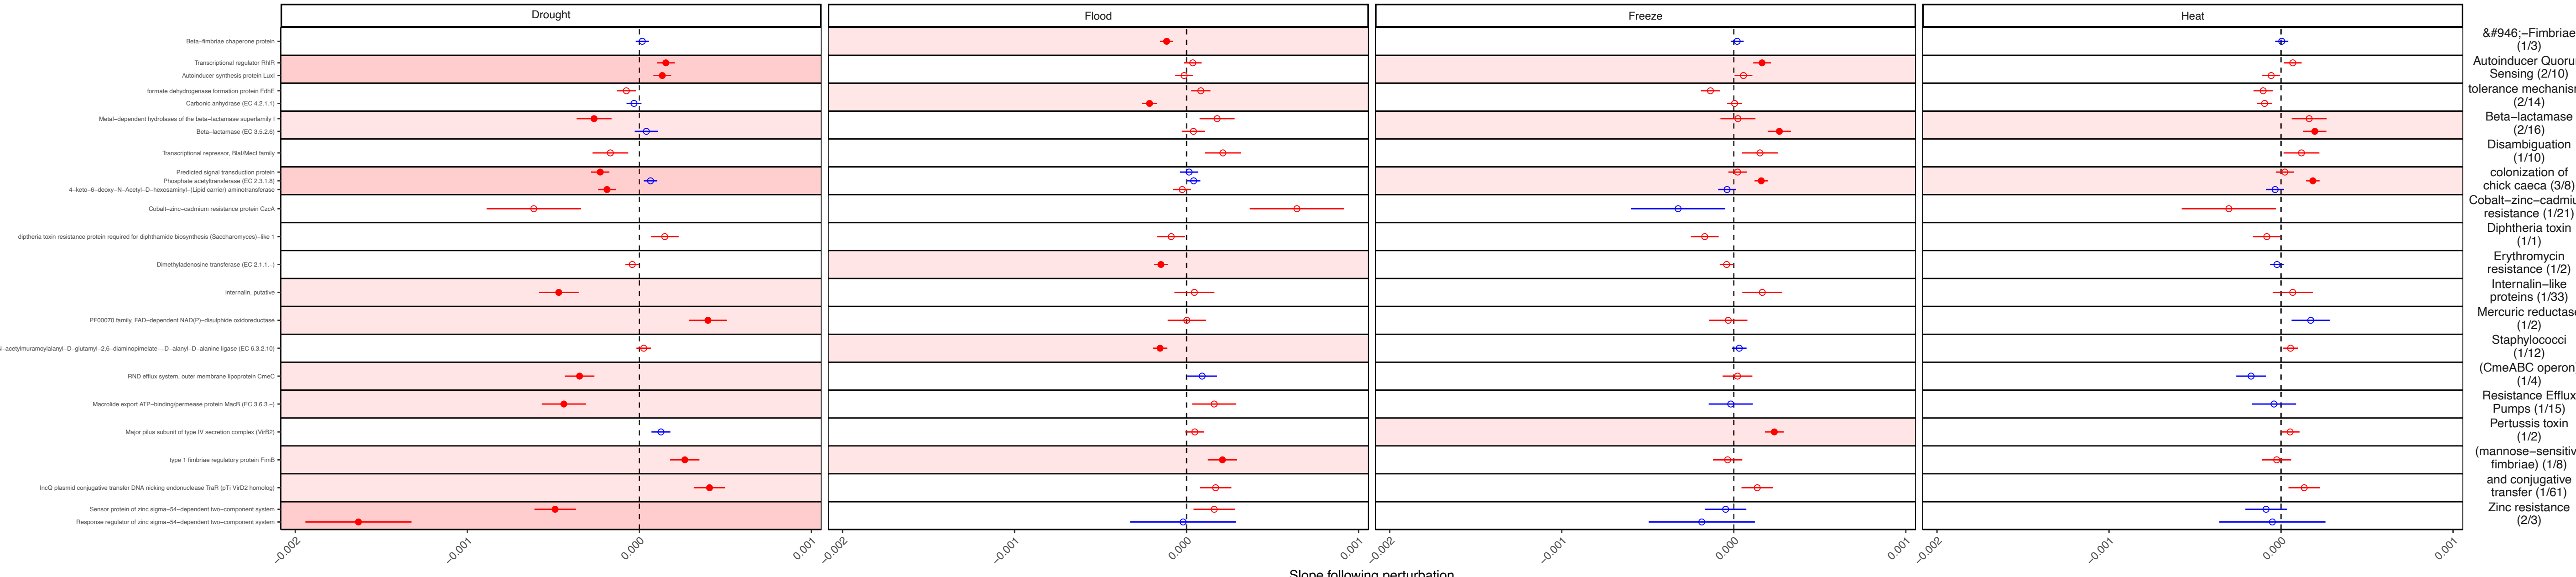

- &#946;-Fimbriae (1/3)
- Autoinducer Quorum Sensing (2/10)
- tolerance mechanisms (2/14)
- Beta-lactamase (2/16)
- Disambiguation (1/10)
- colonization of chick caeca (3/8)
- Cobalt-zinc-cadmium resistance (1/21)
- Diphtheria toxin (1/1)
- Erythromycin resistance (1/2)
- Internalin-like proteins (1/33)
- Mercuric reductase (1/2)
- Staphylococci (1/12)
- (CmeABC operon) (1/4)
- Resistance Efflux Pumps (1/15)
- Pertussis toxin (1/2)
- (mannose-sensitive fimbriae) (1/8)
- and conjugative transfer (1/61)
- Zinc resistance (2/3)
